# Supplementary material for: Catalytic properties of a cobalt metal–organic framework with a zwitterionic ligand synthesized in situ
Source: Royal Society of Chemistry journal article supplement (doi:10.1039/c7dt03364h), 2017-01-01
Supplement: c7dt03364h1.pdf [file c7dt03364h1.pdf]

## Supplementary Information

Catalytic Properties of a Cobalt Metal-Organic Framework with a Zwitterionic Ligand  
Synthesized *In Situ*

T. A. Grigolo<sup>†</sup>, S. Denofre, F. Manarin, G. V. Botteselle, P. Brandão, A. Amaral and E. A. de Campos<sup>†</sup>

Materials Science Research Group, Center of Engineering and Exact Sciences, State University of Western  
Parana, Toledo, Parana, Brazil.

<sup>†</sup>Corresponding authors. E-mail address: thiago.grigolo@gmail.com (T. A. Grigolo), elvioantonio@uol.com.br (E. A. de Campos).

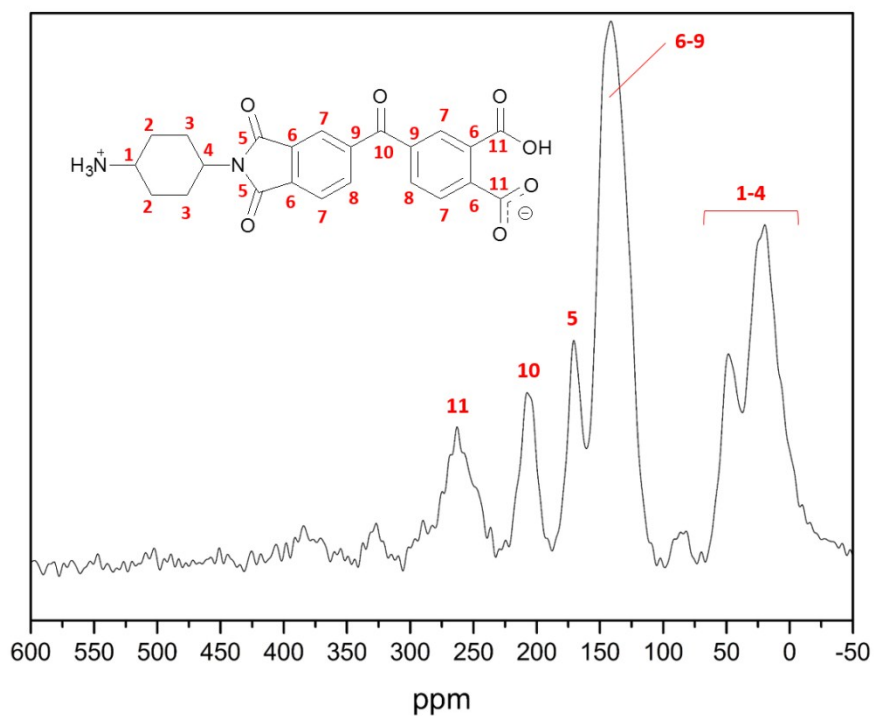

Figure S1.  $^{13}\text{C}$  Nuclear magnetic resonance spectrum of the Co-MOF.

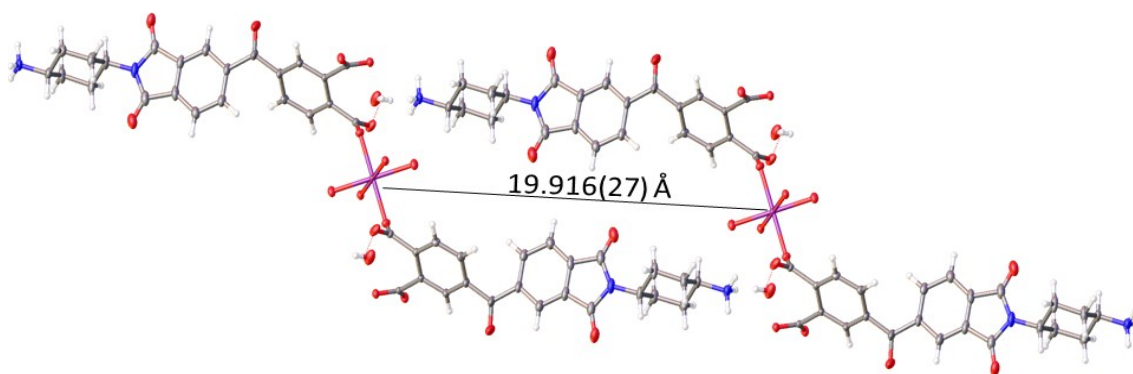

Figure S2. Crystallographic structure showing the distance between the cobalt centers of different 1D units (green) and hydrogen bonds between the ammonium ion and the oxygens of the coordination sphere of cobalt (yellow).

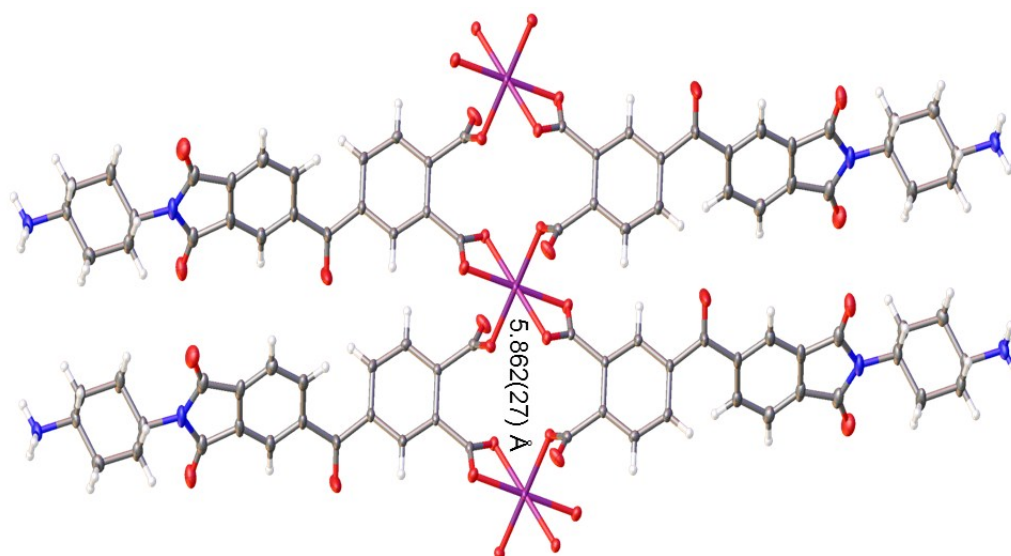

Figure S3. Crystallographic structure showing the distance between the cobalt centers of the same 1D unit.

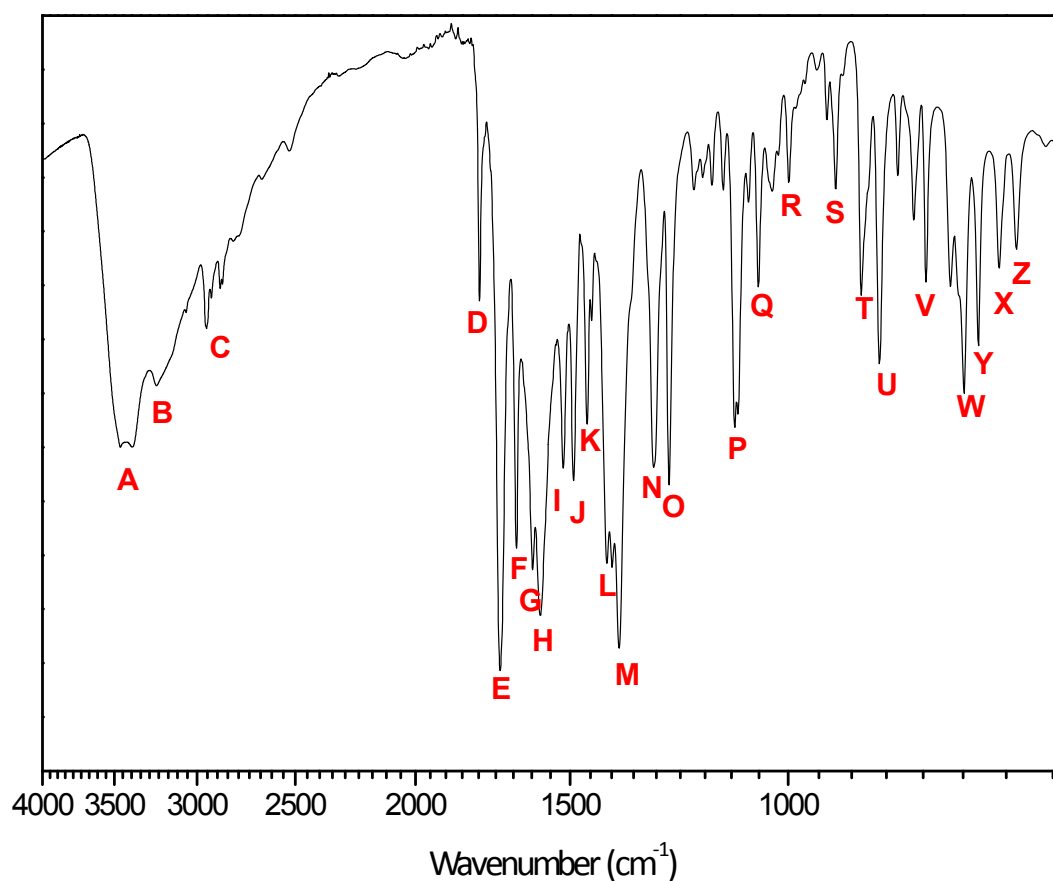

Figure S4. FT-IR spectrum of Co-MOF obtained on KBr optics. A) 3469-3400  $\text{cm}^{-1}$ , B) 3238  $\text{cm}^{-1}$ , C) 2949-2878  $\text{cm}^{-1}$ , D) 1774  $\text{cm}^{-1}$ , E) 1708  $\text{cm}^{-1}$ , F) 1657  $\text{cm}^{-1}$ , G) 1608  $\text{cm}^{-1}$ , H) 1586  $\text{cm}^{-1}$ , I) 1523  $\text{cm}^{-1}$ , J) 1486  $\text{cm}^{-1}$ , K) 1456  $\text{cm}^{-1}$ , L) 1402  $\text{cm}^{-1}$ , M) 1368  $\text{cm}^{-1}$ , N) 1280  $\text{cm}^{-1}$ , O) 1247  $\text{cm}^{-1}$ , P) 1107  $\text{cm}^{-1}$ , Q) 1057  $\text{cm}^{-1}$ , R) 998  $\text{cm}^{-1}$ , S) 919  $\text{cm}^{-1}$ , T) 871  $\text{cm}^{-1}$ , U) 845  $\text{cm}^{-1}$ , V) 775  $\text{cm}^{-1}$ , W) 772  $\text{cm}^{-1}$ , Y) 702  $\text{cm}^{-1}$ , X) 673  $\text{cm}^{-1}$  and Z) 657  $\text{cm}^{-1}$ .

Table S1. Bond Lengths

| Number | Atom 1 | Atom 2 | Cyclicity | Length   |
|--------|--------|--------|-----------|----------|
| 1      | Co     | O1     | acyclic   | 2.068    |
| 2      | Co     | O11    | cyclic    | 2.133    |
| 3      | Co     | O12    | cyclic    | 2.132    |
| 4      | O1     | C3     | acyclic   | 1.264(3) |
| 5      | O2     | C3     | acyclic   | 1.240(4) |
| 6      | C3     | C4     | acyclic   | 1.511(4) |
| 7      | C4     | C5     | cyclic    | 1.382(4) |
| 8      | C4     | C9     | cyclic    | 1.404(4) |
| 9      | C5     | H5     | acyclic   | 0.950    |
| 10     | C5     | C6     | cyclic    | 1.388(4) |
| 11     | C6     | H6     | acyclic   | 0.950    |
| 12     | C6     | C7     | cyclic    | 1.396(4) |
| 13     | C7     | C8     | cyclic    | 1.399(4) |
| 14     | C7     | C13    | acyclic   | 1.488(4) |
| 15     | C8     | H8     | acyclic   | 0.950    |
| 16     | C8     | C9     | cyclic    | 1.383(4) |
| 17     | C9     | C10    | acyclic   | 1.500(4) |
| 18     | C10    | O11    | acyclic   | 1.258(4) |
| 19     | C10    | O12    | acyclic   | 1.262(4) |
| 20     | C13    | O14    | acyclic   | 1.223(5) |
| 21     | C13    | C15    | acyclic   | 1.494(5) |
| 22     | C15    | C16    | cyclic    | 1.400(6) |
| 23     | C15    | C20    | cyclic    | 1.403(5) |
| 24     | C16    | H16    | acyclic   | 0.950    |
| 25     | C16    | C17    | cyclic    | 1.403(5) |
| 26     | C17    | H17    | acyclic   | 0.950    |
| 27     | C17    | C18    | cyclic    | 1.386(5) |
| 28     | C18    | C19    | cyclic    | 1.383(6) |
| 29     | C18    | C21    | cyclic    | 1.506(5) |
| 30     | C19    | C20    | cyclic    | 1.378(5) |
| 31     | C19    | C24    | cyclic    | 1.493(5) |
| 32     | C20    | H20    | acyclic   | 0.950    |
| 33     | C21    | O22    | acyclic   | 1.203(6) |
| 34     | C21    | N23    | cyclic    | 1.410(5) |
| 35     | N23    | C24    | cyclic    | 1.400(5) |
| 36     | N23    | C26    | acyclic   | 1.476(4) |
| 37     | C24    | O25    | acyclic   | 1.203(5) |
| 38     | C26    | H26    | acyclic   | 1.05(5)  |
| 39     | C26    | C27    | cyclic    | 1.528(5) |
| 40     | C26    | C31    | cyclic    | 1.520(5) |
| 41     | C27    | H27A   | acyclic   | 0.990    |
| 42     | C27    | H27B   | acyclic   | 0.990    |
| 43     | C27    | C28    | cyclic    | 1.541(5) |
| 44     | C28    | H28A   | acyclic   | 0.990    |
| 45     | C28    | H28B   | acyclic   | 0.990    |
| 46     | C28    | C29    | cyclic    | 1.520(5) |
| 47     | C29    | H29    | acyclic   | 1.01(5)  |

|    |      |      |         |          |
|----|------|------|---------|----------|
| 48 | C29  | C30  | cyclic  | 1.502(5) |
| 49 | C29  | N32  | acyclic | 1.501(4) |
| 50 | C30  | H30A | acyclic | 0.990    |
| 51 | C30  | H30B | acyclic | 0.990    |
| 52 | C30  | C31  | cyclic  | 1.523(5) |
| 53 | C31  | H31A | acyclic | 0.990    |
| 54 | C31  | H31B | acyclic | 0.990    |
| 55 | N32  | H32A | acyclic | 0.910    |
| 56 | N32  | H32B | acyclic | 0.910    |
| 57 | N32  | H32C | acyclic | 0.910    |
| 58 | O100 | H10A | acyclic | 0.83(3)  |
| 59 | O100 | H10B | acyclic | 0.84(3)  |

---

Table S2. Bond angles.

| Number | Atom 1 | Atom 2 | Atom 3 | Angle    |
|--------|--------|--------|--------|----------|
| 1      | O1     | Co     | O1     | 180.00   |
| 2      | O1     | Co     | O11    | 93.32    |
| 3      | O1     | Co     | O11    | 86.68    |
| 4      | O1     | Co     | O12    | 86.10    |
| 5      | O1     | Co     | O12    | 93.90    |
| 6      | O1     | Co     | O11    | 86.68    |
| 7      | O1     | Co     | O11    | 93.32    |
| 8      | O1     | Co     | O12    | 93.90    |
| 9      | O1     | Co     | O12    | 86.10    |
| 10     | O11    | Co     | O11    | 180.00   |
| 11     | O11    | Co     | O12    | 62.13    |
| 12     | O11    | Co     | O12    | 117.87   |
| 13     | O11    | Co     | O12    | 117.87   |
| 14     | O11    | Co     | O12    | 62.13    |
| 15     | O12    | Co     | O12    | 180.00   |
| 16     | Co     | O1     | C3     | 124.3    |
| 17     | O1     | C3     | O2     | 125.2(3) |
| 18     | O1     | C3     | C4     | 115.4(2) |
| 19     | O2     | C3     | C4     | 119.4(3) |
| 20     | C3     | C4     | C5     | 120.8(3) |
| 21     | C3     | C4     | C9     | 119.7(2) |
| 22     | C5     | C4     | C9     | 119.3(3) |
| 23     | C4     | C5     | H5     | 119.3    |
| 24     | C4     | C5     | C6     | 121.5(3) |
| 25     | H5     | C5     | C6     | 119.3    |
| 26     | C5     | C6     | H6     | 120.4    |
| 27     | C5     | C6     | C7     | 119.3(3) |
| 28     | H6     | C6     | C7     | 120.3    |
| 29     | C6     | C7     | C8     | 119.5(3) |
| 30     | C6     | C7     | C13    | 122.7(3) |
| 31     | C8     | C7     | C13    | 117.6(3) |
| 32     | C7     | C8     | H8     | 119.6    |
| 33     | C7     | C8     | C9     | 120.8(3) |
| 34     | H8     | C8     | C9     | 119.6    |
| 35     | C4     | C9     | C8     | 119.6(3) |
| 36     | C4     | C9     | C10    | 119.6(2) |
| 37     | C8     | C9     | C10    | 120.7(3) |
| 38     | C9     | C10    | O11    | 118.8(2) |
| 39     | C9     | C10    | O12    | 119.5(3) |
| 40     | O11    | C10    | O12    | 121.7(3) |
| 41     | C10    | O11    | Co     | 88.1     |
| 42     | C10    | O12    | Co     | 88.1     |
| 43     | C7     | C13    | O14    | 118.9(3) |
| 44     | C7     | C13    | C15    | 122.3(3) |
| 45     | O14    | C13    | C15    | 118.8(3) |
| 46     | C13    | C15    | C16    | 122.4(3) |
| 47     | C13    | C15    | C20    | 116.8(3) |
| 48     | C16    | C15    | C20    | 120.6(3) |
| 49     | C15    | C16    | H16    | 119.4    |

|     |      |     |      |          |
|-----|------|-----|------|----------|
| 50  | C15  | C16 | C17  | 121.2(3) |
| 51  | H16  | C16 | C17  | 119.4    |
| 52  | C16  | C17 | H17  | 121.5    |
| 53  | C16  | C17 | C18  | 117.0(3) |
| 54  | H17  | C17 | C18  | 121.5    |
| 55  | C17  | C18 | C19  | 121.7(3) |
| 56  | C17  | C18 | C21  | 130.2(3) |
| 57  | C19  | C18 | C21  | 108.0(3) |
| 58  | C18  | C19 | C20  | 121.9(3) |
| 59  | C18  | C19 | C24  | 109.2(3) |
| 60  | C20  | C19 | C24  | 128.9(3) |
| 61  | C15  | C20 | C19  | 117.6(3) |
| 62  | C15  | C20 | H20  | 121.2    |
| 63  | C19  | C20 | H20  | 121.2    |
| 64  | C18  | C21 | O22  | 128.6(3) |
| 65  | C18  | C21 | N23  | 104.9(3) |
| 66  | O22  | C21 | N23  | 126.5(4) |
| 67  | C21  | N23 | C24  | 112.7(3) |
| 68  | C21  | N23 | C26  | 126.3(3) |
| 69  | C24  | N23 | C26  | 120.4(3) |
| 70  | C19  | C24 | N23  | 105.1(3) |
| 71  | C19  | C24 | O25  | 129.1(3) |
| 72  | N23  | C24 | O25  | 125.8(3) |
| 73  | N23  | C26 | H26  | 107(2)   |
| 74  | N23  | C26 | C27  | 112.0(3) |
| 75  | N23  | C26 | C31  | 110.6(3) |
| 76  | H26  | C26 | C27  | 109(2)   |
| 77  | H26  | C26 | C31  | 106(2)   |
| 78  | C27  | C26 | C31  | 112.0(3) |
| 79  | C26  | C27 | H27A | 109.8    |
| 80  | C26  | C27 | H27B | 109.8    |
| 81  | C26  | C27 | C28  | 109.3(3) |
| 82  | H27A | C27 | H27B | 108.2    |
| 83  | H27A | C27 | C28  | 109.8    |
| 84  | H27B | C27 | C28  | 109.8    |
| 85  | C27  | C28 | H28A | 109.8    |
| 86  | C27  | C28 | H28B | 109.8    |
| 87  | C27  | C28 | C29  | 109.3(3) |
| 88  | H28A | C28 | H28B | 108.3    |
| 89  | H28A | C28 | C29  | 109.8    |
| 90  | H28B | C28 | C29  | 109.8    |
| 91  | C28  | C29 | H29  | 108(2)   |
| 92  | C28  | C29 | C30  | 112.0(3) |
| 93  | C28  | C29 | N32  | 110.3(3) |
| 94  | H29  | C29 | C30  | 114(2)   |
| 95  | H29  | C29 | N32  | 103(2)   |
| 96  | C30  | C29 | N32  | 109.3(3) |
| 97  | C29  | C30 | H30A | 109.6    |
| 98  | C29  | C30 | H30B | 109.6    |
| 99  | C29  | C30 | C31  | 110.1(3) |
| 100 | H30A | C30 | H30B | 108.1    |

|     |      |     |      |          |
|-----|------|-----|------|----------|
| 101 | H30A | C30 | C31  | 109.6    |
| 102 | H30B | C30 | C31  | 109.7    |
| 103 | C26  | C31 | C30  | 111.1(3) |
| 104 | C26  | C31 | H31A | 109.4    |
| 105 | C26  | C31 | H31B | 109.5    |
| 106 | C30  | C31 | H31A | 109.5    |
| 107 | C30  | C31 | H31B | 109.4    |
| 108 | H31A | C31 | H31B | 108.0    |
| 109 | C29  | N32 | H32A | 109.5    |
| 110 | C29  | N32 | H32B | 109.5    |
| 111 | C29  | N32 | H32C | 109.5    |
| 112 | H32A | N32 | H32B | 109.5    |
| 113 | H32A | N32 | H32C | 109.4    |
| 114 | H32B | N32 | H32C | 109.5    |
| 115 | Co   | O1  | C3   | 124.3    |
| 116 | O1   | C3  | O2   | 125.2(3) |
| 117 | O1   | C3  | C4   | 115.4(2) |
| 118 | O2   | C3  | C4   | 119.4(3) |
| 119 | C3   | C4  | C5   | 120.8(3) |
| 120 | C3   | C4  | C9   | 119.7(2) |
| 121 | C5   | C4  | C9   | 119.3(3) |
| 122 | C4   | C5  | H5   | 119.3    |
| 123 | C4   | C5  | C6   | 121.5(3) |
| 124 | H5   | C5  | C6   | 119.3    |
| 125 | C5   | C6  | H6   | 120.4    |
| 126 | C5   | C6  | C7   | 119.3(3) |
| 127 | H6   | C6  | C7   | 120.3    |
| 128 | C6   | C7  | C8   | 119.5(3) |
| 129 | C6   | C7  | C13  | 122.7(3) |
| 130 | C8   | C7  | C13  | 117.6(3) |
| 131 | C7   | C8  | H8   | 119.6    |
| 132 | C7   | C8  | C9   | 120.8(3) |
| 133 | H8   | C8  | C9   | 119.6    |
| 134 | C4   | C9  | C8   | 119.6(3) |
| 135 | C4   | C9  | C10  | 119.6(2) |
| 136 | C8   | C9  | C10  | 120.7(3) |
| 137 | C9   | C10 | O11  | 118.8(2) |
| 138 | C9   | C10 | O12  | 119.5(3) |
| 139 | O11  | C10 | O12  | 121.7(3) |
| 140 | C10  | O11 | Co   | 88.1     |
| 141 | C10  | O12 | Co   | 88.1     |
| 142 | C7   | C13 | O14  | 118.9(3) |
| 143 | C7   | C13 | C15  | 122.3(3) |
| 144 | O14  | C13 | C15  | 118.8(3) |
| 145 | C13  | C15 | C16  | 122.4(3) |
| 146 | C13  | C15 | C20  | 116.8(3) |
| 147 | C16  | C15 | C20  | 120.6(3) |
| 148 | C15  | C16 | H16  | 119.4    |
| 149 | C15  | C16 | C17  | 121.2(3) |
| 150 | H16  | C16 | C17  | 119.4    |
| 151 | C16  | C17 | H17  | 121.5    |



|     |      |     |      |          |
|-----|------|-----|------|----------|
| 152 | C16  | C17 | C18  | 117.0(3) |
| 153 | H17  | C17 | C18  | 121.5    |
| 154 | C17  | C18 | C19  | 121.7(3) |
| 155 | C17  | C18 | C21  | 130.2(3) |
| 156 | C19  | C18 | C21  | 108.0(3) |
| 157 | C18  | C19 | C20  | 121.9(3) |
| 158 | C18  | C19 | C24  | 109.2(3) |
| 159 | C20  | C19 | C24  | 128.9(3) |
| 160 | C15  | C20 | C19  | 117.6(3) |
| 161 | C15  | C20 | H20  | 121.2    |
| 162 | C19  | C20 | H20  | 121.2    |
| 163 | C18  | C21 | O22  | 128.6(3) |
| 164 | C18  | C21 | N23  | 104.9(3) |
| 165 | O22  | C21 | N23  | 126.5(4) |
| 166 | C21  | N23 | C24  | 112.7(3) |
| 167 | C21  | N23 | C26  | 126.3(3) |
| 168 | C24  | N23 | C26  | 120.4(3) |
| 169 | C19  | C24 | N23  | 105.1(3) |
| 170 | C19  | C24 | O25  | 129.1(3) |
| 171 | N23  | C24 | O25  | 125.8(3) |
| 172 | N23  | C26 | H26  | 107(2)   |
| 173 | N23  | C26 | C27  | 112.0(3) |
| 174 | N23  | C26 | C31  | 110.6(3) |
| 175 | H26  | C26 | C27  | 109(2)   |
| 176 | H26  | C26 | C31  | 106(2)   |
| 177 | C27  | C26 | C31  | 112.0(3) |
| 178 | C26  | C27 | H27A | 109.8    |
| 179 | C26  | C27 | H27B | 109.8    |
| 180 | C26  | C27 | C28  | 109.3(3) |
| 181 | H27A | C27 | H27B | 108.2    |
| 182 | H27A | C27 | C28  | 109.8    |
| 183 | H27B | C27 | C28  | 109.8    |
| 184 | C27  | C28 | H28A | 109.8    |
| 185 | C27  | C28 | H28B | 109.8    |
| 186 | C27  | C28 | C29  | 109.3(3) |
| 187 | H28A | C28 | H28B | 108.3    |
| 188 | H28A | C28 | C29  | 109.8    |
| 189 | H28B | C28 | C29  | 109.8    |
| 190 | C28  | C29 | H29  | 108(2)   |
| 191 | C28  | C29 | C30  | 112.0(3) |
| 192 | C28  | C29 | N32  | 110.3(3) |
| 193 | H29  | C29 | C30  | 114(2)   |
| 194 | H29  | C29 | N32  | 103(2)   |
| 195 | C30  | C29 | N32  | 109.3(3) |
| 196 | C29  | C30 | H30A | 109.6    |
| 197 | C29  | C30 | H30B | 109.6    |
| 198 | C29  | C30 | C31  | 110.1(3) |
| 199 | H30A | C30 | H30B | 108.1    |
| 200 | H30A | C30 | C31  | 109.6    |
| 201 | H30B | C30 | C31  | 109.7    |
| 202 | C26  | C31 | C30  | 111.1(3) |

|     |      |     |      |          |
|-----|------|-----|------|----------|
| 203 | C26  | C31 | H31A | 109.4    |
| 204 | C26  | C31 | H31B | 109.5    |
| 205 | C30  | C31 | H31A | 109.5    |
| 206 | C30  | C31 | H31B | 109.4    |
| 207 | H31A | C31 | H31B | 108.0    |
| 208 | C29  | N32 | H32A | 109.5    |
| 209 | C29  | N32 | H32B | 109.5    |
| 210 | C29  | N32 | H32C | 109.5    |
| 211 | H32A | N32 | H32B | 109.5    |
| 212 | H32A | N32 | H32C | 109.4    |
| 213 | H32B | N32 | H32C | 109.5    |
| 214 | O11  | Co  | O12  | 62.13    |
| 215 | O11  | Co  | O1   | 86.68    |
| 216 | O11  | Co  | O1   | 93.32    |
| 217 | O11  | Co  | O11  | 180.00   |
| 218 | O11  | Co  | O12  | 117.87   |
| 219 | O12  | Co  | O1   | 93.90    |
| 220 | O12  | Co  | O1   | 86.10    |
| 221 | O12  | Co  | O11  | 117.87   |
| 222 | O12  | Co  | O12  | 180.00   |
| 223 | O1   | Co  | O1   | 180.00   |
| 224 | O1   | Co  | O11  | 93.32    |
| 225 | O1   | Co  | O12  | 86.10    |
| 226 | O1   | Co  | O11  | 86.68    |
| 227 | O1   | Co  | O12  | 93.90    |
| 228 | O11  | Co  | O12  | 62.13    |
| 229 | O11  | Co  | O12  | 62.13    |
| 230 | O11  | Co  | O1   | 93.32    |
| 231 | O11  | Co  | O1   | 86.68    |
| 232 | O11  | Co  | O11  | 180.00   |
| 233 | O11  | Co  | O12  | 117.87   |
| 234 | O12  | Co  | O1   | 86.10    |
| 235 | O12  | Co  | O1   | 93.90    |
| 236 | O12  | Co  | O11  | 117.87   |
| 237 | O12  | Co  | O12  | 180.00   |
| 238 | O1   | Co  | O1   | 180.00   |
| 239 | O1   | Co  | O11  | 86.68    |
| 240 | O1   | Co  | O12  | 93.90    |
| 241 | O1   | Co  | O11  | 93.32    |
| 242 | O1   | Co  | O12  | 86.10    |
| 243 | O11  | Co  | O12  | 62.13    |
| 244 | Co   | O11 | C10  | 88.1     |
| 245 | Co   | O11 | C10  | 88.1     |
| 246 | Co   | O12 | C10  | 88.1     |
| 247 | Co   | O12 | C10  | 88.1     |
| 248 | Co   | O1  | C3   | 124.3    |
| 249 | Co   | O1  | C3   | 124.3    |
| 250 | O1   | C3  | O2   | 125.2(3) |
| 251 | O1   | C3  | C4   | 115.4(2) |
| 252 | O2   | C3  | C4   | 119.4(3) |
| 253 | C3   | C4  | C5   | 120.8(3) |

|     |     |     |     |          |
|-----|-----|-----|-----|----------|
| 254 | C3  | C4  | C9  | 119.7(2) |
| 255 | C5  | C4  | C9  | 119.3(3) |
| 256 | C4  | C5  | H5  | 119.3    |
| 257 | C4  | C5  | C6  | 121.5(3) |
| 258 | H5  | C5  | C6  | 119.3    |
| 259 | C4  | C9  | C8  | 119.6(3) |
| 260 | C4  | C9  | C10 | 119.6(2) |
| 261 | C8  | C9  | C10 | 120.7(3) |
| 262 | C5  | C6  | H6  | 120.4    |
| 263 | C5  | C6  | C7  | 119.3(3) |
| 264 | H6  | C6  | C7  | 120.3    |
| 265 | C6  | C7  | C8  | 119.5(3) |
| 266 | C6  | C7  | C13 | 122.7(3) |
| 267 | C8  | C7  | C13 | 117.6(3) |
| 268 | C9  | C8  | C7  | 120.8(3) |
| 269 | C9  | C8  | H8  | 119.6    |
| 270 | C7  | C8  | H8  | 119.6    |
| 271 | C7  | C13 | O14 | 118.9(3) |
| 272 | C7  | C13 | C15 | 122.3(3) |
| 273 | O14 | C13 | C15 | 118.8(3) |
| 274 | O11 | C10 | O12 | 121.7(3) |
| 275 | O11 | C10 | C9  | 118.8(2) |
| 276 | O12 | C10 | C9  | 119.5(3) |
| 277 | C13 | C15 | C16 | 122.4(3) |
| 278 | C13 | C15 | C20 | 116.8(3) |
| 279 | C16 | C15 | C20 | 120.6(3) |
| 280 | C15 | C16 | H16 | 119.4    |
| 281 | C15 | C16 | C17 | 121.2(3) |
| 282 | H16 | C16 | C17 | 119.4    |
| 283 | C15 | C20 | C19 | 117.6(3) |
| 284 | C15 | C20 | H20 | 121.2    |
| 285 | C19 | C20 | H20 | 121.2    |
| 286 | C16 | C17 | H17 | 121.5    |
| 287 | C16 | C17 | C18 | 117.0(3) |
| 288 | H17 | C17 | C18 | 121.5    |
| 289 | C17 | C18 | C19 | 121.7(3) |
| 290 | C17 | C18 | C21 | 130.2(3) |
| 291 | C19 | C18 | C21 | 108.0(3) |
| 292 | C20 | C19 | C18 | 121.9(3) |
| 293 | C20 | C19 | C24 | 128.9(3) |
| 294 | C18 | C19 | C24 | 109.2(3) |
| 295 | C18 | C21 | O22 | 128.6(3) |
| 296 | C18 | C21 | N23 | 104.9(3) |
| 297 | O22 | C21 | N23 | 126.5(4) |
| 298 | C19 | C24 | N23 | 105.1(3) |
| 299 | C19 | C24 | O25 | 129.1(3) |
| 300 | N23 | C24 | O25 | 125.8(3) |
| 301 | C21 | N23 | C24 | 112.7(3) |
| 302 | C21 | N23 | C26 | 126.3(3) |
| 303 | C24 | N23 | C26 | 120.4(3) |
| 304 | N23 | C26 | H26 | 107(2)   |

|     |      |     |      |          |
|-----|------|-----|------|----------|
| 305 | N23  | C26 | C27  | 112.0(3) |
| 306 | N23  | C26 | C31  | 110.6(3) |
| 307 | H26  | C26 | C27  | 109(2)   |
| 308 | H26  | C26 | C31  | 106(2)   |
| 309 | C27  | C26 | C31  | 112.0(3) |
| 310 | C26  | C27 | H27A | 109.8    |
| 311 | C26  | C27 | H27B | 109.8    |
| 312 | C26  | C27 | C28  | 109.3(3) |
| 313 | H27A | C27 | H27B | 108.2    |
| 314 | H27A | C27 | C28  | 109.8    |
| 315 | H27B | C27 | C28  | 109.8    |
| 316 | C26  | C31 | C30  | 111.1(3) |
| 317 | C26  | C31 | H31A | 109.4    |
| 318 | C26  | C31 | H31B | 109.5    |
| 319 | C30  | C31 | H31A | 109.5    |
| 320 | C30  | C31 | H31B | 109.4    |
| 321 | H31A | C31 | H31B | 108.0    |
| 322 | C27  | C28 | H28A | 109.8    |
| 323 | C27  | C28 | H28B | 109.8    |
| 324 | C27  | C28 | C29  | 109.3(3) |
| 325 | H28A | C28 | H28B | 108.3    |
| 326 | H28A | C28 | C29  | 109.8    |
| 327 | H28B | C28 | C29  | 109.8    |
| 328 | C28  | C29 | H29  | 108(2)   |
| 329 | C28  | C29 | C30  | 112.0(3) |
| 330 | C28  | C29 | N32  | 110.3(3) |
| 331 | H29  | C29 | C30  | 114(2)   |
| 332 | H29  | C29 | N32  | 103(2)   |
| 333 | C30  | C29 | N32  | 109.3(3) |
| 334 | C31  | C30 | C29  | 110.1(3) |
| 335 | C31  | C30 | H30A | 109.6    |
| 336 | C31  | C30 | H30B | 109.7    |
| 337 | C29  | C30 | H30A | 109.6    |
| 338 | C29  | C30 | H30B | 109.6    |
| 339 | H30A | C30 | H30B | 108.1    |
| 340 | C29  | N32 | H32A | 109.5    |
| 341 | C29  | N32 | H32B | 109.5    |
| 342 | C29  | N32 | H32C | 109.5    |
| 343 | H32A | N32 | H32B | 109.5    |
| 344 | H32A | N32 | H32C | 109.4    |
| 345 | H32B | N32 | H32C | 109.5    |
| 346 | O1   | C3  | O2   | 125.2(3) |
| 347 | O1   | C3  | C4   | 115.4(2) |
| 348 | O2   | C3  | C4   | 119.4(3) |
| 349 | C3   | C4  | C5   | 120.8(3) |
| 350 | C3   | C4  | C9   | 119.7(2) |
| 351 | C5   | C4  | C9   | 119.3(3) |
| 352 | C4   | C5  | H5   | 119.3    |
| 353 | C4   | C5  | C6   | 121.5(3) |
| 354 | H5   | C5  | C6   | 119.3    |
| 355 | C4   | C9  | C8   | 119.6(3) |

|     |     |     |     |          |
|-----|-----|-----|-----|----------|
| 356 | C4  | C9  | C10 | 119.6(2) |
| 357 | C8  | C9  | C10 | 120.7(3) |
| 358 | C5  | C6  | H6  | 120.4    |
| 359 | C5  | C6  | C7  | 119.3(3) |
| 360 | H6  | C6  | C7  | 120.3    |
| 361 | C6  | C7  | C8  | 119.5(3) |
| 362 | C6  | C7  | C13 | 122.7(3) |
| 363 | C8  | C7  | C13 | 117.6(3) |
| 364 | C9  | C8  | C7  | 120.8(3) |
| 365 | C9  | C8  | H8  | 119.6    |
| 366 | C7  | C8  | H8  | 119.6    |
| 367 | C7  | C13 | O14 | 118.9(3) |
| 368 | C7  | C13 | C15 | 122.3(3) |
| 369 | O14 | C13 | C15 | 118.8(3) |
| 370 | C9  | C10 | O11 | 118.8(2) |
| 371 | C9  | C10 | O12 | 119.5(3) |
| 372 | O11 | C10 | O12 | 121.7(3) |
| 373 | C10 | O11 | Co  | 88.1     |
| 374 | C10 | O12 | Co  | 88.1     |
| 375 | O11 | Co  | O12 | 62.13    |
| 376 | C13 | C15 | C16 | 122.4(3) |
| 377 | C13 | C15 | C20 | 116.8(3) |
| 378 | C16 | C15 | C20 | 120.6(3) |
| 379 | C15 | C16 | H16 | 119.4    |
| 380 | C15 | C16 | C17 | 121.2(3) |
| 381 | H16 | C16 | C17 | 119.4    |
| 382 | C15 | C20 | C19 | 117.6(3) |
| 383 | C15 | C20 | H20 | 121.2    |
| 384 | C19 | C20 | H20 | 121.2    |
| 385 | C16 | C17 | H17 | 121.5    |
| 386 | C16 | C17 | C18 | 117.0(3) |
| 387 | H17 | C17 | C18 | 121.5    |
| 388 | C17 | C18 | C19 | 121.7(3) |
| 389 | C17 | C18 | C21 | 130.2(3) |
| 390 | C19 | C18 | C21 | 108.0(3) |
| 391 | C20 | C19 | C18 | 121.9(3) |
| 392 | C20 | C19 | C24 | 128.9(3) |
| 393 | C18 | C19 | C24 | 109.2(3) |
| 394 | C18 | C21 | O22 | 128.6(3) |
| 395 | C18 | C21 | N23 | 104.9(3) |
| 396 | O22 | C21 | N23 | 126.5(4) |
| 397 | C19 | C24 | N23 | 105.1(3) |
| 398 | C19 | C24 | O25 | 129.1(3) |
| 399 | N23 | C24 | O25 | 125.8(3) |
| 400 | C21 | N23 | C24 | 112.7(3) |
| 401 | C21 | N23 | C26 | 126.3(3) |
| 402 | C24 | N23 | C26 | 120.4(3) |
| 403 | N23 | C26 | H26 | 107(2)   |
| 404 | N23 | C26 | C27 | 112.0(3) |
| 405 | N23 | C26 | C31 | 110.6(3) |
| 406 | H26 | C26 | C27 | 109(2)   |

|     |      |     |      |          |
|-----|------|-----|------|----------|
| 407 | H26  | C26 | C31  | 106(2)   |
| 408 | C27  | C26 | C31  | 112.0(3) |
| 409 | C26  | C27 | H27A | 109.8    |
| 410 | C26  | C27 | H27B | 109.8    |
| 411 | C26  | C27 | C28  | 109.3(3) |
| 412 | H27A | C27 | H27B | 108.2    |
| 413 | H27A | C27 | C28  | 109.8    |
| 414 | H27B | C27 | C28  | 109.8    |
| 415 | C26  | C31 | C30  | 111.1(3) |
| 416 | C26  | C31 | H31A | 109.4    |
| 417 | C26  | C31 | H31B | 109.5    |
| 418 | C30  | C31 | H31A | 109.5    |
| 419 | C30  | C31 | H31B | 109.4    |
| 420 | H31A | C31 | H31B | 108.0    |
| 421 | C27  | C28 | H28A | 109.8    |
| 422 | C27  | C28 | H28B | 109.8    |
| 423 | C27  | C28 | C29  | 109.3(3) |
| 424 | H28A | C28 | H28B | 108.3    |
| 425 | H28A | C28 | C29  | 109.8    |
| 426 | H28B | C28 | C29  | 109.8    |
| 427 | C28  | C29 | H29  | 108(2)   |
| 428 | C28  | C29 | C30  | 112.0(3) |
| 429 | C28  | C29 | N32  | 110.3(3) |
| 430 | H29  | C29 | C30  | 114(2)   |
| 431 | H29  | C29 | N32  | 103(2)   |
| 432 | C30  | C29 | N32  | 109.3(3) |
| 433 | C31  | C30 | C29  | 110.1(3) |
| 434 | C31  | C30 | H30A | 109.6    |
| 435 | C31  | C30 | H30B | 109.7    |
| 436 | C29  | C30 | H30A | 109.6    |
| 437 | C29  | C30 | H30B | 109.6    |
| 438 | H30A | C30 | H30B | 108.1    |
| 439 | C29  | N32 | H32A | 109.5    |
| 440 | C29  | N32 | H32B | 109.5    |
| 441 | C29  | N32 | H32C | 109.5    |
| 442 | H32A | N32 | H32B | 109.5    |
| 443 | H32A | N32 | H32C | 109.4    |
| 444 | H32B | N32 | H32C | 109.5    |
| 445 | Co   | O1  | C3   | 124.3    |
| 446 | Co   | O1  | C3   | 124.3    |
| 447 | O1   | C3  | O2   | 125.2(3) |
| 448 | O1   | C3  | C4   | 115.4(2) |
| 449 | O2   | C3  | C4   | 119.4(3) |
| 450 | C3   | C4  | C5   | 120.8(3) |
| 451 | C3   | C4  | C9   | 119.7(2) |
| 452 | C5   | C4  | C9   | 119.3(3) |
| 453 | C4   | C5  | H5   | 119.3    |
| 454 | C4   | C5  | C6   | 121.5(3) |
| 455 | H5   | C5  | C6   | 119.3    |
| 456 | C4   | C9  | C8   | 119.6(3) |
| 457 | C4   | C9  | C10  | 119.6(2) |

|     |     |     |     |          |
|-----|-----|-----|-----|----------|
| 458 | C8  | C9  | C10 | 120.7(3) |
| 459 | C5  | C6  | H6  | 120.4    |
| 460 | C5  | C6  | C7  | 119.3(3) |
| 461 | H6  | C6  | C7  | 120.3    |
| 462 | C6  | C7  | C8  | 119.5(3) |
| 463 | C6  | C7  | C13 | 122.7(3) |
| 464 | C8  | C7  | C13 | 117.6(3) |
| 465 | C9  | C8  | C7  | 120.8(3) |
| 466 | C9  | C8  | H8  | 119.6    |
| 467 | C7  | C8  | H8  | 119.6    |
| 468 | C7  | C13 | O14 | 118.9(3) |
| 469 | C7  | C13 | C15 | 122.3(3) |
| 470 | O14 | C13 | C15 | 118.8(3) |
| 471 | C9  | C10 | O11 | 118.8(2) |
| 472 | C9  | C10 | O12 | 119.5(3) |
| 473 | O11 | C10 | O12 | 121.7(3) |
| 474 | C10 | O11 | Co  | 88.1     |
| 475 | C10 | O12 | Co  | 88.1     |
| 476 | O11 | Co  | O12 | 62.13    |
| 477 | C13 | C15 | C16 | 122.4(3) |
| 478 | C13 | C15 | C20 | 116.8(3) |
| 479 | C16 | C15 | C20 | 120.6(3) |
| 480 | C15 | C16 | H16 | 119.4    |
| 481 | C15 | C16 | C17 | 121.2(3) |
| 482 | H16 | C16 | C17 | 119.4    |
| 483 | C15 | C20 | C19 | 117.6(3) |
| 484 | C15 | C20 | H20 | 121.2    |
| 485 | C19 | C20 | H20 | 121.2    |
| 486 | C16 | C17 | H17 | 121.5    |
| 487 | C16 | C17 | C18 | 117.0(3) |
| 488 | H17 | C17 | C18 | 121.5    |
| 489 | C17 | C18 | C19 | 121.7(3) |
| 490 | C17 | C18 | C21 | 130.2(3) |
| 491 | C19 | C18 | C21 | 108.0(3) |
| 492 | C20 | C19 | C18 | 121.9(3) |
| 493 | C20 | C19 | C24 | 128.9(3) |
| 494 | C18 | C19 | C24 | 109.2(3) |
| 495 | C18 | C21 | O22 | 128.6(3) |
| 496 | C18 | C21 | N23 | 104.9(3) |
| 497 | O22 | C21 | N23 | 126.5(4) |
| 498 | C19 | C24 | N23 | 105.1(3) |
| 499 | C19 | C24 | O25 | 129.1(3) |
| 500 | N23 | C24 | O25 | 125.8(3) |
| 501 | C21 | N23 | C24 | 112.7(3) |
| 502 | C21 | N23 | C26 | 126.3(3) |
| 503 | C24 | N23 | C26 | 120.4(3) |
| 504 | N23 | C26 | H26 | 107(2)   |
| 505 | N23 | C26 | C27 | 112.0(3) |
| 506 | N23 | C26 | C31 | 110.6(3) |
| 507 | H26 | C26 | C27 | 109(2)   |
| 508 | H26 | C26 | C31 | 106(2)   |

|     |      |     |      |          |
|-----|------|-----|------|----------|
| 509 | C27  | C26 | C31  | 112.0(3) |
| 510 | C26  | C27 | H27A | 109.8    |
| 511 | C26  | C27 | H27B | 109.8    |
| 512 | C26  | C27 | C28  | 109.3(3) |
| 513 | H27A | C27 | H27B | 108.2    |
| 514 | H27A | C27 | C28  | 109.8    |
| 515 | H27B | C27 | C28  | 109.8    |
| 516 | C26  | C31 | C30  | 111.1(3) |
| 517 | C26  | C31 | H31A | 109.4    |
| 518 | C26  | C31 | H31B | 109.5    |
| 519 | C30  | C31 | H31A | 109.5    |
| 520 | C30  | C31 | H31B | 109.4    |
| 521 | H31A | C31 | H31B | 108.0    |
| 522 | C27  | C28 | H28A | 109.8    |
| 523 | C27  | C28 | H28B | 109.8    |
| 524 | C27  | C28 | C29  | 109.3(3) |
| 525 | H28A | C28 | H28B | 108.3    |
| 526 | H28A | C28 | C29  | 109.8    |
| 527 | H28B | C28 | C29  | 109.8    |
| 528 | C28  | C29 | H29  | 108(2)   |
| 529 | C28  | C29 | C30  | 112.0(3) |
| 530 | C28  | C29 | N32  | 110.3(3) |
| 531 | H29  | C29 | C30  | 114(2)   |
| 532 | H29  | C29 | N32  | 103(2)   |
| 533 | C30  | C29 | N32  | 109.3(3) |
| 534 | C31  | C30 | C29  | 110.1(3) |
| 535 | C31  | C30 | H30A | 109.6    |
| 536 | C31  | C30 | H30B | 109.7    |
| 537 | C29  | C30 | H30A | 109.6    |
| 538 | C29  | C30 | H30B | 109.6    |
| 539 | H30A | C30 | H30B | 108.1    |
| 540 | C29  | N32 | H32A | 109.5    |
| 541 | C29  | N32 | H32B | 109.5    |
| 542 | C29  | N32 | H32C | 109.5    |
| 543 | H32A | N32 | H32B | 109.5    |
| 544 | H32A | N32 | H32C | 109.4    |
| 545 | H32B | N32 | H32C | 109.5    |
| 546 | O1   | C3  | O2   | 125.2(3) |
| 547 | O1   | C3  | C4   | 115.4(2) |
| 548 | O2   | C3  | C4   | 119.4(3) |
| 549 | C3   | C4  | C5   | 120.8(3) |
| 550 | C3   | C4  | C9   | 119.7(2) |
| 551 | C5   | C4  | C9   | 119.3(3) |
| 552 | C4   | C5  | H5   | 119.3    |
| 553 | C4   | C5  | C6   | 121.5(3) |
| 554 | H5   | C5  | C6   | 119.3    |
| 555 | C4   | C9  | C8   | 119.6(3) |
| 556 | C4   | C9  | C10  | 119.6(2) |
| 557 | C8   | C9  | C10  | 120.7(3) |
| 558 | C5   | C6  | H6   | 120.4    |
| 559 | C5   | C6  | C7   | 119.3(3) |



|     |      |     |      |          |
|-----|------|-----|------|----------|
| 560 | H6   | C6  | C7   | 120.3    |
| 561 | C6   | C7  | C8   | 119.5(3) |
| 562 | C6   | C7  | C13  | 122.7(3) |
| 563 | C8   | C7  | C13  | 117.6(3) |
| 564 | C9   | C8  | C7   | 120.8(3) |
| 565 | C9   | C8  | H8   | 119.6    |
| 566 | C7   | C8  | H8   | 119.6    |
| 567 | C7   | C13 | O14  | 118.9(3) |
| 568 | C7   | C13 | C15  | 122.3(3) |
| 569 | O14  | C13 | C15  | 118.8(3) |
| 570 | O11  | C10 | O12  | 121.7(3) |
| 571 | O11  | C10 | C9   | 118.8(2) |
| 572 | O12  | C10 | C9   | 119.5(3) |
| 573 | C13  | C15 | C16  | 122.4(3) |
| 574 | C13  | C15 | C20  | 116.8(3) |
| 575 | C16  | C15 | C20  | 120.6(3) |
| 576 | C15  | C16 | H16  | 119.4    |
| 577 | C15  | C16 | C17  | 121.2(3) |
| 578 | H16  | C16 | C17  | 119.4    |
| 579 | C15  | C20 | C19  | 117.6(3) |
| 580 | C15  | C20 | H20  | 121.2    |
| 581 | C19  | C20 | H20  | 121.2    |
| 582 | C16  | C17 | H17  | 121.5    |
| 583 | C16  | C17 | C18  | 117.0(3) |
| 584 | H17  | C17 | C18  | 121.5    |
| 585 | C17  | C18 | C19  | 121.7(3) |
| 586 | C17  | C18 | C21  | 130.2(3) |
| 587 | C19  | C18 | C21  | 108.0(3) |
| 588 | C20  | C19 | C18  | 121.9(3) |
| 589 | C20  | C19 | C24  | 128.9(3) |
| 590 | C18  | C19 | C24  | 109.2(3) |
| 591 | C18  | C21 | O22  | 128.6(3) |
| 592 | C18  | C21 | N23  | 104.9(3) |
| 593 | O22  | C21 | N23  | 126.5(4) |
| 594 | C19  | C24 | N23  | 105.1(3) |
| 595 | C19  | C24 | O25  | 129.1(3) |
| 596 | N23  | C24 | O25  | 125.8(3) |
| 597 | C21  | N23 | C24  | 112.7(3) |
| 598 | C21  | N23 | C26  | 126.3(3) |
| 599 | C24  | N23 | C26  | 120.4(3) |
| 600 | N23  | C26 | H26  | 107(2)   |
| 601 | N23  | C26 | C27  | 112.0(3) |
| 602 | N23  | C26 | C31  | 110.6(3) |
| 603 | H26  | C26 | C27  | 109(2)   |
| 604 | H26  | C26 | C31  | 106(2)   |
| 605 | C27  | C26 | C31  | 112.0(3) |
| 606 | C26  | C27 | H27A | 109.8    |
| 607 | C26  | C27 | H27B | 109.8    |
| 608 | C26  | C27 | C28  | 109.3(3) |
| 609 | H27A | C27 | H27B | 108.2    |
| 610 | H27A | C27 | C28  | 109.8    |

|     |      |      |      |          |
|-----|------|------|------|----------|
| 611 | H27B | C27  | C28  | 109.8    |
| 612 | C26  | C31  | C30  | 111.1(3) |
| 613 | C26  | C31  | H31A | 109.4    |
| 614 | C26  | C31  | H31B | 109.5    |
| 615 | C30  | C31  | H31A | 109.5    |
| 616 | C30  | C31  | H31B | 109.4    |
| 617 | H31A | C31  | H31B | 108.0    |
| 618 | C27  | C28  | H28A | 109.8    |
| 619 | C27  | C28  | H28B | 109.8    |
| 620 | C27  | C28  | C29  | 109.3(3) |
| 621 | H28A | C28  | H28B | 108.3    |
| 622 | H28A | C28  | C29  | 109.8    |
| 623 | H28B | C28  | C29  | 109.8    |
| 624 | C28  | C29  | H29  | 108(2)   |
| 625 | C28  | C29  | C30  | 112.0(3) |
| 626 | C28  | C29  | N32  | 110.3(3) |
| 627 | H29  | C29  | C30  | 114(2)   |
| 628 | H29  | C29  | N32  | 103(2)   |
| 629 | C30  | C29  | N32  | 109.3(3) |
| 630 | C31  | C30  | C29  | 110.1(3) |
| 631 | C31  | C30  | H30A | 109.6    |
| 632 | C31  | C30  | H30B | 109.7    |
| 633 | C29  | C30  | H30A | 109.6    |
| 634 | C29  | C30  | H30B | 109.6    |
| 635 | H30A | C30  | H30B | 108.1    |
| 636 | C29  | N32  | H32A | 109.5    |
| 637 | C29  | N32  | H32B | 109.5    |
| 638 | C29  | N32  | H32C | 109.5    |
| 639 | H32A | N32  | H32B | 109.5    |
| 640 | H32A | N32  | H32C | 109.4    |
| 641 | H32B | N32  | H32C | 109.5    |
| 642 | H10A | O100 | H10B | 102(4)   |

---

Table S3. Bond torsion.

| Number | Atom 1 | Atom 2 | Atom 3 | Atom 4 | Torsion   |
|--------|--------|--------|--------|--------|-----------|
| 1      | O1     | Co     | O1     | C3     | Undefined |
| 2      | O11    | Co     | O1     | C3     | 19.8      |
| 3      | O11    | Co     | O1     | C3     | -160.2    |
| 4      | O12    | Co     | O1     | C3     | 81.6      |
| 5      | O12    | Co     | O1     | C3     | -98.4     |
| 6      | O1     | Co     | O1     | C3     | Undefined |
| 7      | O11    | Co     | O1     | C3     | 160.2     |
| 8      | O11    | Co     | O1     | C3     | -19.8     |
| 9      | O12    | Co     | O1     | C3     | 98.4      |
| 10     | O12    | Co     | O1     | C3     | -81.6     |
| 11     | O1     | Co     | O11    | C10    | 83.7      |
| 12     | O1     | Co     | O11    | C10    | -96.3     |
| 13     | O11    | Co     | O11    | C10    | Undefined |
| 14     | O12    | Co     | O11    | C10    | -0.2      |
| 15     | O12    | Co     | O11    | C10    | 179.8     |
| 16     | O1     | Co     | O11    | C10    | 96.3      |
| 17     | O1     | Co     | O11    | C10    | -83.7     |
| 18     | O11    | Co     | O11    | C10    | Undefined |
| 19     | O12    | Co     | O11    | C10    | -179.8    |
| 20     | O12    | Co     | O11    | C10    | 0.2       |
| 21     | O1     | Co     | O12    | C10    | -95.7     |
| 22     | O1     | Co     | O12    | C10    | 84.3      |
| 23     | O11    | Co     | O12    | C10    | 0.1       |
| 24     | O11    | Co     | O12    | C10    | -179.9    |
| 25     | O12    | Co     | O12    | C10    | Undefined |
| 26     | O1     | Co     | O12    | C10    | -84.3     |
| 27     | O1     | Co     | O12    | C10    | 95.7      |
| 28     | O11    | Co     | O12    | C10    | 179.9     |
| 29     | O11    | Co     | O12    | C10    | -0.1      |
| 30     | O12    | Co     | O12    | C10    | Undefined |
| 31     | Co     | O1     | C3     | O2     | 44.1      |
| 32     | Co     | O1     | C3     | C4     | -134.9    |
| 33     | O1     | C3     | C4     | C5     | 117.9(3)  |
| 34     | O1     | C3     | C4     | C9     | -56.2(4)  |
| 35     | O2     | C3     | C4     | C5     | -61.2(4)  |
| 36     | O2     | C3     | C4     | C9     | 124.7(3)  |
| 37     | C3     | C4     | C5     | H5     | 7.0       |
| 38     | C3     | C4     | C5     | C6     | -173.0(3) |
| 39     | C9     | C4     | C5     | H5     | -178.9    |
| 40     | C9     | C4     | C5     | C6     | 1.1(4)    |
| 41     | C3     | C4     | C9     | C8     | 173.6(3)  |
| 42     | C3     | C4     | C9     | C10    | -9.4(4)   |
| 43     | C5     | C4     | C9     | C8     | -0.5(4)   |
| 44     | C5     | C4     | C9     | C10    | 176.4(3)  |
| 45     | C4     | C5     | C6     | H6     | 179.1     |
| 46     | C4     | C5     | C6     | C7     | -0.9(4)   |
| 47     | H5     | C5     | C6     | H6     | -0.9      |
| 48     | H5     | C5     | C6     | C7     | 179.0     |
| 49     | C5     | C6     | C7     | C8     | 0.2(4)    |

|     |     |     |     |     |           |
|-----|-----|-----|-----|-----|-----------|
| 50  | C5  | C6  | C7  | C13 | -174.1(3) |
| 51  | H6  | C6  | C7  | C8  | -179.8    |
| 52  | H6  | C6  | C7  | C13 | 5.9       |
| 53  | C6  | C7  | C8  | H8  | -179.7    |
| 54  | C6  | C7  | C8  | C9  | 0.3(5)    |
| 55  | C13 | C7  | C8  | H8  | -5.1      |
| 56  | C13 | C7  | C8  | C9  | 174.9(3)  |
| 57  | C6  | C7  | C13 | O14 | 138.6(4)  |
| 58  | C6  | C7  | C13 | C15 | -42.1(5)  |
| 59  | C8  | C7  | C13 | O14 | -35.8(5)  |
| 60  | C8  | C7  | C13 | C15 | 143.5(3)  |
| 61  | C7  | C8  | C9  | C4  | -0.1(4)   |
| 62  | C7  | C8  | C9  | C10 | -177.1(3) |
| 63  | H8  | C8  | C9  | C4  | 179.8     |
| 64  | H8  | C8  | C9  | C10 | 2.9       |
| 65  | C4  | C9  | C10 | O11 | -45.2(4)  |
| 66  | C4  | C9  | C10 | O12 | 135.1(3)  |
| 67  | C8  | C9  | C10 | O11 | 131.8(3)  |
| 68  | C8  | C9  | C10 | O12 | -47.9(4)  |
| 69  | C9  | C10 | O11 | Co  | -179.4    |
| 70  | O12 | C10 | O11 | Co  | 0.3       |
| 71  | C9  | C10 | O12 | Co  | 179.4     |
| 72  | O11 | C10 | O12 | Co  | -0.3      |
| 73  | C10 | O11 | Co  | O12 | -0.2      |
| 74  | C10 | O11 | Co  | O1  | 83.7      |
| 75  | C10 | O11 | Co  | O1  | -96.3     |
| 76  | C10 | O11 | Co  | O11 | Undefined |
| 77  | C10 | O11 | Co  | O12 | 179.8     |
| 78  | C10 | O12 | Co  | O11 | 0.1       |
| 79  | C10 | O12 | Co  | O1  | -95.7     |
| 80  | C10 | O12 | Co  | O1  | 84.3      |
| 81  | C10 | O12 | Co  | O11 | -179.9    |
| 82  | C10 | O12 | Co  | O12 | Undefined |
| 83  | C7  | C13 | C15 | C16 | -22.3(5)  |
| 84  | C7  | C13 | C15 | C20 | 162.6(3)  |
| 85  | O14 | C13 | C15 | C16 | 156.9(4)  |
| 86  | O14 | C13 | C15 | C20 | -18.2(5)  |
| 87  | C13 | C15 | C16 | H16 | 6.6       |
| 88  | C13 | C15 | C16 | C17 | -173.5(3) |
| 89  | C20 | C15 | C16 | H16 | -178.6    |
| 90  | C20 | C15 | C16 | C17 | 1.4(5)    |
| 91  | C13 | C15 | C20 | C19 | 174.5(3)  |
| 92  | C13 | C15 | C20 | H20 | -5.6      |
| 93  | C16 | C15 | C20 | C19 | -0.7(5)   |
| 94  | C16 | C15 | C20 | H20 | 179.3     |
| 95  | C15 | C16 | C17 | H17 | 179.0     |
| 96  | C15 | C16 | C17 | C18 | -1.0(5)   |
| 97  | H16 | C16 | C17 | H17 | -1.1      |
| 98  | H16 | C16 | C17 | C18 | 178.9     |
| 99  | C16 | C17 | C18 | C19 | 0.0(5)    |
| 100 | C16 | C17 | C18 | C21 | 176.2(3)  |

|     |     |     |     |      |           |
|-----|-----|-----|-----|------|-----------|
| 101 | H17 | C17 | C18 | C19  | -180.0    |
| 102 | H17 | C17 | C18 | C21  | -3.8      |
| 103 | C17 | C18 | C19 | C20  | 0.6(5)    |
| 104 | C17 | C18 | C19 | C24  | -179.9(3) |
| 105 | C21 | C18 | C19 | C20  | -176.3(3) |
| 106 | C21 | C18 | C19 | C24  | 3.2(4)    |
| 107 | C17 | C18 | C21 | O22  | -1.4(7)   |
| 108 | C17 | C18 | C21 | N23  | 179.4(4)  |
| 109 | C19 | C18 | C21 | O22  | 175.1(4)  |
| 110 | C19 | C18 | C21 | N23  | -4.0(4)   |
| 111 | C18 | C19 | C20 | C15  | -0.3(5)   |
| 112 | C18 | C19 | C20 | H20  | 179.7     |
| 113 | C24 | C19 | C20 | C15  | -179.6(3) |
| 114 | C24 | C19 | C20 | H20  | 0.4       |
| 115 | C18 | C19 | C24 | N23  | -1.1(4)   |
| 116 | C18 | C19 | C24 | O25  | 179.2(4)  |
| 117 | C20 | C19 | C24 | N23  | 178.3(4)  |
| 118 | C20 | C19 | C24 | O25  | -1.4(7)   |
| 119 | C18 | C21 | N23 | C24  | 3.5(4)    |
| 120 | C18 | C21 | N23 | C26  | 174.7(3)  |
| 121 | O22 | C21 | N23 | C24  | -175.7(4) |
| 122 | O22 | C21 | N23 | C26  | -4.5(6)   |
| 123 | C21 | N23 | C24 | C19  | -1.6(4)   |
| 124 | C21 | N23 | C24 | O25  | 178.1(4)  |
| 125 | C26 | N23 | C24 | C19  | -173.5(3) |
| 126 | C26 | N23 | C24 | O25  | 6.3(6)    |
| 127 | C21 | N23 | C26 | H26  | 179(2)    |
| 128 | C21 | N23 | C26 | C27  | 59.8(5)   |
| 129 | C21 | N23 | C26 | C31  | -66.0(5)  |
| 130 | C24 | N23 | C26 | H26  | -10(2)    |
| 131 | C24 | N23 | C26 | C27  | -129.6(3) |
| 132 | C24 | N23 | C26 | C31  | 104.6(4)  |
| 133 | N23 | C26 | C27 | H27A | 58.1      |
| 134 | N23 | C26 | C27 | H27B | -60.9     |
| 135 | N23 | C26 | C27 | C28  | 178.6(3)  |
| 136 | H26 | C26 | C27 | H27A | -60       |
| 137 | H26 | C26 | C27 | H27B | -179      |
| 138 | H26 | C26 | C27 | C28  | 60(2)     |
| 139 | C31 | C26 | C27 | H27A | -177.0    |
| 140 | C31 | C26 | C27 | H27B | 64.1      |
| 141 | C31 | C26 | C27 | C28  | -56.4(4)  |
| 142 | N23 | C26 | C31 | C30  | -178.7(3) |
| 143 | N23 | C26 | C31 | H31A | 60.3      |
| 144 | N23 | C26 | C31 | H31B | -57.8     |
| 145 | H26 | C26 | C31 | C30  | -63(2)    |
| 146 | H26 | C26 | C31 | H31A | 176       |
| 147 | H26 | C26 | C31 | H31B | 58        |
| 148 | C27 | C26 | C31 | C30  | 55.5(4)   |
| 149 | C27 | C26 | C31 | H31A | -65.4     |
| 150 | C27 | C26 | C31 | H31B | 176.5     |
| 151 | C26 | C27 | C28 | H28A | 177.8     |

|     |      |     |     |      |           |
|-----|------|-----|-----|------|-----------|
| 152 | C26  | C27 | C28 | H28B | -63.3     |
| 153 | C26  | C27 | C28 | C29  | 57.3(4)   |
| 154 | H27A | C27 | C28 | H28A | -61.7     |
| 155 | H27A | C27 | C28 | H28B | 57.3      |
| 156 | H27A | C27 | C28 | C29  | 177.8     |
| 157 | H27B | C27 | C28 | H28A | 57.2      |
| 158 | H27B | C27 | C28 | H28B | 176.2     |
| 159 | H27B | C27 | C28 | C29  | -63.3     |
| 160 | C27  | C28 | C29 | H29  | 67(3)     |
| 161 | C27  | C28 | C29 | C30  | -59.6(4)  |
| 162 | C27  | C28 | C29 | N32  | 178.3(3)  |
| 163 | H28A | C28 | C29 | H29  | -53       |
| 164 | H28A | C28 | C29 | C30  | 179.9     |
| 165 | H28A | C28 | C29 | N32  | 57.8      |
| 166 | H28B | C28 | C29 | H29  | -172      |
| 167 | H28B | C28 | C29 | C30  | 61.0      |
| 168 | H28B | C28 | C29 | N32  | -61.1     |
| 169 | C28  | C29 | C30 | H30A | -62.6     |
| 170 | C28  | C29 | C30 | H30B | 178.9     |
| 171 | C28  | C29 | C30 | C31  | 58.1(4)   |
| 172 | H29  | C29 | C30 | H30A | 174       |
| 173 | H29  | C29 | C30 | H30B | 56        |
| 174 | H29  | C29 | C30 | C31  | -65(3)    |
| 175 | N32  | C29 | C30 | H30A | 60.1      |
| 176 | N32  | C29 | C30 | H30B | -58.5     |
| 177 | N32  | C29 | C30 | C31  | -179.2(3) |
| 178 | C28  | C29 | N32 | H32A | 66.1      |
| 179 | C28  | C29 | N32 | H32B | -54.0     |
| 180 | C28  | C29 | N32 | H32C | -174.0    |
| 181 | H29  | C29 | N32 | H32A | -179      |
| 182 | H29  | C29 | N32 | H32B | 61        |
| 183 | H29  | C29 | N32 | H32C | -59       |
| 184 | C30  | C29 | N32 | H32A | -57.6     |
| 185 | C30  | C29 | N32 | H32B | -177.6    |
| 186 | C30  | C29 | N32 | H32C | 62.3      |
| 187 | C29  | C30 | C31 | C26  | -55.1(4)  |
| 188 | C29  | C30 | C31 | H31A | 65.8      |
| 189 | C29  | C30 | C31 | H31B | -176.0    |
| 190 | H30A | C30 | C31 | C26  | 65.6      |
| 191 | H30A | C30 | C31 | H31A | -173.5    |
| 192 | H30A | C30 | C31 | H31B | -55.3     |
| 193 | H30B | C30 | C31 | C26  | -175.8    |
| 194 | H30B | C30 | C31 | H31A | -54.9     |
| 195 | H30B | C30 | C31 | H31B | 63.3      |
| 196 | Co   | O1  | C3  | O2   | -44.1     |
| 197 | Co   | O1  | C3  | C4   | 134.9     |
| 198 | O1   | C3  | C4  | C5   | -117.9(3) |
| 199 | O1   | C3  | C4  | C9   | 56.2(4)   |
| 200 | O2   | C3  | C4  | C5   | 61.2(4)   |
| 201 | O2   | C3  | C4  | C9   | -124.7(3) |
| 202 | C3   | C4  | C5  | H5   | -7.0      |

|     |     |     |     |     |           |
|-----|-----|-----|-----|-----|-----------|
| 203 | C3  | C4  | C5  | C6  | 173.0(3)  |
| 204 | C9  | C4  | C5  | H5  | 178.9     |
| 205 | C9  | C4  | C5  | C6  | -1.1(4)   |
| 206 | C3  | C4  | C9  | C8  | -173.6(3) |
| 207 | C3  | C4  | C9  | C10 | 9.4(4)    |
| 208 | C5  | C4  | C9  | C8  | 0.5(4)    |
| 209 | C5  | C4  | C9  | C10 | -176.4(3) |
| 210 | C4  | C5  | C6  | H6  | -179.1    |
| 211 | C4  | C5  | C6  | C7  | 0.9(4)    |
| 212 | H5  | C5  | C6  | H6  | 0.9       |
| 213 | H5  | C5  | C6  | C7  | -179.0    |
| 214 | C5  | C6  | C7  | C8  | -0.2(4)   |
| 215 | C5  | C6  | C7  | C13 | 174.1(3)  |
| 216 | H6  | C6  | C7  | C8  | 179.8     |
| 217 | H6  | C6  | C7  | C13 | -5.9      |
| 218 | C6  | C7  | C8  | H8  | 179.7     |
| 219 | C6  | C7  | C8  | C9  | -0.3(5)   |
| 220 | C13 | C7  | C8  | H8  | 5.1       |
| 221 | C13 | C7  | C8  | C9  | -174.9(3) |
| 222 | C6  | C7  | C13 | O14 | -138.6(4) |
| 223 | C6  | C7  | C13 | C15 | 42.1(5)   |
| 224 | C8  | C7  | C13 | O14 | 35.8(5)   |
| 225 | C8  | C7  | C13 | C15 | -143.5(3) |
| 226 | C7  | C8  | C9  | C4  | 0.1(4)    |
| 227 | C7  | C8  | C9  | C10 | 177.1(3)  |
| 228 | H8  | C8  | C9  | C4  | -179.8    |
| 229 | H8  | C8  | C9  | C10 | -2.9      |
| 230 | C4  | C9  | C10 | O11 | 45.2(4)   |
| 231 | C4  | C9  | C10 | O12 | -135.1(3) |
| 232 | C8  | C9  | C10 | O11 | -131.8(3) |
| 233 | C8  | C9  | C10 | O12 | 47.9(4)   |
| 234 | C9  | C10 | O11 | Co  | 179.4     |
| 235 | O12 | C10 | O11 | Co  | -0.3      |
| 236 | C9  | C10 | O12 | Co  | -179.4    |
| 237 | O11 | C10 | O12 | Co  | 0.3       |
| 238 | C10 | O11 | Co  | O12 | 0.2       |
| 239 | C10 | O11 | Co  | O1  | 96.3      |
| 240 | C10 | O11 | Co  | O1  | -83.7     |
| 241 | C10 | O11 | Co  | O11 | Undefined |
| 242 | C10 | O11 | Co  | O12 | -179.8    |
| 243 | C10 | O12 | Co  | O11 | -0.1      |
| 244 | C10 | O12 | Co  | O1  | -84.3     |
| 245 | C10 | O12 | Co  | O1  | 95.7      |
| 246 | C10 | O12 | Co  | O11 | 179.9     |
| 247 | C10 | O12 | Co  | O12 | Undefined |
| 248 | C7  | C13 | C15 | C16 | 22.3(5)   |
| 249 | C7  | C13 | C15 | C20 | -162.6(3) |
| 250 | O14 | C13 | C15 | C16 | -156.9(4) |
| 251 | O14 | C13 | C15 | C20 | 18.2(5)   |
| 252 | C13 | C15 | C16 | H16 | -6.6      |
| 253 | C13 | C15 | C16 | C17 | 173.5(3)  |

|     |     |     |     |      |           |
|-----|-----|-----|-----|------|-----------|
| 254 | C20 | C15 | C16 | H16  | 178.6     |
| 255 | C20 | C15 | C16 | C17  | -1.4(5)   |
| 256 | C13 | C15 | C20 | C19  | -174.5(3) |
| 257 | C13 | C15 | C20 | H20  | 5.6       |
| 258 | C16 | C15 | C20 | C19  | 0.7(5)    |
| 259 | C16 | C15 | C20 | H20  | -179.3    |
| 260 | C15 | C16 | C17 | H17  | -179.0    |
| 261 | C15 | C16 | C17 | C18  | 1.0(5)    |
| 262 | H16 | C16 | C17 | H17  | 1.1       |
| 263 | H16 | C16 | C17 | C18  | -178.9    |
| 264 | C16 | C17 | C18 | C19  | -0.0(5)   |
| 265 | C16 | C17 | C18 | C21  | -176.2(3) |
| 266 | H17 | C17 | C18 | C19  | 180.0     |
| 267 | H17 | C17 | C18 | C21  | 3.8       |
| 268 | C17 | C18 | C19 | C20  | -0.6(5)   |
| 269 | C17 | C18 | C19 | C24  | 179.9(3)  |
| 270 | C21 | C18 | C19 | C20  | 176.3(3)  |
| 271 | C21 | C18 | C19 | C24  | -3.2(4)   |
| 272 | C17 | C18 | C21 | O22  | 1.4(7)    |
| 273 | C17 | C18 | C21 | N23  | -179.4(4) |
| 274 | C19 | C18 | C21 | O22  | -175.1(4) |
| 275 | C19 | C18 | C21 | N23  | 4.0(4)    |
| 276 | C18 | C19 | C20 | C15  | 0.3(5)    |
| 277 | C18 | C19 | C20 | H20  | -179.7    |
| 278 | C24 | C19 | C20 | C15  | 179.6(3)  |
| 279 | C24 | C19 | C20 | H20  | -0.4      |
| 280 | C18 | C19 | C24 | N23  | 1.1(4)    |
| 281 | C18 | C19 | C24 | O25  | -179.2(4) |
| 282 | C20 | C19 | C24 | N23  | -178.3(4) |
| 283 | C20 | C19 | C24 | O25  | 1.4(7)    |
| 284 | C18 | C21 | N23 | C24  | -3.5(4)   |
| 285 | C18 | C21 | N23 | C26  | -174.7(3) |
| 286 | O22 | C21 | N23 | C24  | 175.7(4)  |
| 287 | O22 | C21 | N23 | C26  | 4.5(6)    |
| 288 | C21 | N23 | C24 | C19  | 1.6(4)    |
| 289 | C21 | N23 | C24 | O25  | -178.1(4) |
| 290 | C26 | N23 | C24 | C19  | 173.5(3)  |
| 291 | C26 | N23 | C24 | O25  | -6.3(6)   |
| 292 | C21 | N23 | C26 | H26  | -179(2)   |
| 293 | C21 | N23 | C26 | C27  | -59.8(5)  |
| 294 | C21 | N23 | C26 | C31  | 66.0(5)   |
| 295 | C24 | N23 | C26 | H26  | 10(2)     |
| 296 | C24 | N23 | C26 | C27  | 129.6(3)  |
| 297 | C24 | N23 | C26 | C31  | -104.6(4) |
| 298 | N23 | C26 | C27 | H27A | -58.1     |
| 299 | N23 | C26 | C27 | H27B | 60.9      |
| 300 | N23 | C26 | C27 | C28  | -178.6(3) |
| 301 | H26 | C26 | C27 | H27A | 60        |
| 302 | H26 | C26 | C27 | H27B | 179       |
| 303 | H26 | C26 | C27 | C28  | -60(2)    |
| 304 | C31 | C26 | C27 | H27A | 177.0     |



|     |      |     |     |      |           |
|-----|------|-----|-----|------|-----------|
| 305 | C31  | C26 | C27 | H27B | -64.1     |
| 306 | C31  | C26 | C27 | C28  | 56.4(4)   |
| 307 | N23  | C26 | C31 | C30  | 178.7(3)  |
| 308 | N23  | C26 | C31 | H31A | -60.3     |
| 309 | N23  | C26 | C31 | H31B | 57.8      |
| 310 | H26  | C26 | C31 | C30  | 63(2)     |
| 311 | H26  | C26 | C31 | H31A | -176      |
| 312 | H26  | C26 | C31 | H31B | -58       |
| 313 | C27  | C26 | C31 | C30  | -55.5(4)  |
| 314 | C27  | C26 | C31 | H31A | 65.4      |
| 315 | C27  | C26 | C31 | H31B | -176.5    |
| 316 | C26  | C27 | C28 | H28A | -177.8    |
| 317 | C26  | C27 | C28 | H28B | 63.3      |
| 318 | C26  | C27 | C28 | C29  | -57.3(4)  |
| 319 | H27A | C27 | C28 | H28A | 61.7      |
| 320 | H27A | C27 | C28 | H28B | -57.3     |
| 321 | H27A | C27 | C28 | C29  | -177.8    |
| 322 | H27B | C27 | C28 | H28A | -57.2     |
| 323 | H27B | C27 | C28 | H28B | -176.2    |
| 324 | H27B | C27 | C28 | C29  | 63.3      |
| 325 | C27  | C28 | C29 | H29  | -67(3)    |
| 326 | C27  | C28 | C29 | C30  | 59.6(4)   |
| 327 | C27  | C28 | C29 | N32  | -178.3(3) |
| 328 | H28A | C28 | C29 | H29  | 53        |
| 329 | H28A | C28 | C29 | C30  | -179.9    |
| 330 | H28A | C28 | C29 | N32  | -57.8     |
| 331 | H28B | C28 | C29 | H29  | 172       |
| 332 | H28B | C28 | C29 | C30  | -61.0     |
| 333 | H28B | C28 | C29 | N32  | 61.1      |
| 334 | C28  | C29 | C30 | H30A | 62.6      |
| 335 | C28  | C29 | C30 | H30B | -178.9    |
| 336 | C28  | C29 | C30 | C31  | -58.1(4)  |
| 337 | H29  | C29 | C30 | H30A | -174      |
| 338 | H29  | C29 | C30 | H30B | -56       |
| 339 | H29  | C29 | C30 | C31  | 65(3)     |
| 340 | N32  | C29 | C30 | H30A | -60.1     |
| 341 | N32  | C29 | C30 | H30B | 58.5      |
| 342 | N32  | C29 | C30 | C31  | 179.2(3)  |
| 343 | C28  | C29 | N32 | H32A | -66.1     |
| 344 | C28  | C29 | N32 | H32B | 54.0      |
| 345 | C28  | C29 | N32 | H32C | 174.0     |
| 346 | H29  | C29 | N32 | H32A | 179       |
| 347 | H29  | C29 | N32 | H32B | -61       |
| 348 | H29  | C29 | N32 | H32C | 59        |
| 349 | C30  | C29 | N32 | H32A | 57.6      |
| 350 | C30  | C29 | N32 | H32B | 177.6     |
| 351 | C30  | C29 | N32 | H32C | -62.3     |
| 352 | C29  | C30 | C31 | C26  | 55.1(4)   |
| 353 | C29  | C30 | C31 | H31A | -65.8     |
| 354 | C29  | C30 | C31 | H31B | 176.0     |
| 355 | H30A | C30 | C31 | C26  | -65.6     |

|     |      |     |     |      |           |
|-----|------|-----|-----|------|-----------|
| 356 | H30A | C30 | C31 | H31A | 173.5     |
| 357 | H30A | C30 | C31 | H31B | 55.3      |
| 358 | H30B | C30 | C31 | C26  | 175.8     |
| 359 | H30B | C30 | C31 | H31A | 54.9      |
| 360 | H30B | C30 | C31 | H31B | -63.3     |
| 361 | O11  | Co  | O1  | C3   | -160.2    |
| 362 | O12  | Co  | O1  | C3   | -98.4     |
| 363 | O1   | Co  | O1  | C3   | Undefined |
| 364 | O11  | Co  | O1  | C3   | 19.8      |
| 365 | O12  | Co  | O1  | C3   | 81.6      |
| 366 | O11  | Co  | O1  | C3   | -19.8     |
| 367 | O12  | Co  | O1  | C3   | -81.6     |
| 368 | O1   | Co  | O1  | C3   | Undefined |
| 369 | O11  | Co  | O1  | C3   | 160.2     |
| 370 | O12  | Co  | O1  | C3   | 98.4      |
| 371 | O11  | Co  | O1  | C3   | 19.8      |
| 372 | O12  | Co  | O1  | C3   | 81.6      |
| 373 | O1   | Co  | O1  | C3   | Undefined |
| 374 | O11  | Co  | O1  | C3   | -160.2    |
| 375 | O12  | Co  | O1  | C3   | -98.4     |
| 376 | O11  | Co  | O1  | C3   | 160.2     |
| 377 | O12  | Co  | O1  | C3   | 98.4      |
| 378 | O1   | Co  | O1  | C3   | Undefined |
| 379 | O11  | Co  | O1  | C3   | -19.8     |
| 380 | O12  | Co  | O1  | C3   | -81.6     |
| 381 | Co   | O11 | C10 | O12  | 0.3       |
| 382 | Co   | O11 | C10 | C9   | -179.4    |
| 383 | Co   | O11 | C10 | O12  | -0.3      |
| 384 | Co   | O11 | C10 | C9   | 179.4     |
| 385 | Co   | O12 | C10 | O11  | -0.3      |
| 386 | Co   | O12 | C10 | C9   | 179.4     |
| 387 | Co   | O12 | C10 | O11  | 0.3       |
| 388 | Co   | O12 | C10 | C9   | -179.4    |
| 389 | Co   | O1  | C3  | O2   | 44.1      |
| 390 | Co   | O1  | C3  | C4   | -134.9    |
| 391 | Co   | O1  | C3  | O2   | -44.1     |
| 392 | Co   | O1  | C3  | C4   | 134.9     |
| 393 | O1   | C3  | C4  | C5   | 117.9(3)  |
| 394 | O1   | C3  | C4  | C9   | -56.2(4)  |
| 395 | O2   | C3  | C4  | C5   | -61.2(4)  |
| 396 | O2   | C3  | C4  | C9   | 124.7(3)  |
| 397 | C3   | C4  | C5  | H5   | 7.0       |
| 398 | C3   | C4  | C5  | C6   | -173.0(3) |
| 399 | C9   | C4  | C5  | H5   | -178.9    |
| 400 | C9   | C4  | C5  | C6   | 1.1(4)    |
| 401 | C3   | C4  | C9  | C8   | 173.6(3)  |
| 402 | C3   | C4  | C9  | C10  | -9.4(4)   |
| 403 | C5   | C4  | C9  | C8   | -0.5(4)   |
| 404 | C5   | C4  | C9  | C10  | 176.4(3)  |
| 405 | C4   | C5  | C6  | H6   | 179.1     |
| 406 | C4   | C5  | C6  | C7   | -0.9(4)   |

|     |     |     |     |     |           |
|-----|-----|-----|-----|-----|-----------|
| 407 | H5  | C5  | C6  | H6  | -0.9      |
| 408 | H5  | C5  | C6  | C7  | 179.0     |
| 409 | C4  | C9  | C8  | C7  | -0.1(4)   |
| 410 | C4  | C9  | C8  | H8  | 179.8     |
| 411 | C10 | C9  | C8  | C7  | -177.1(3) |
| 412 | C10 | C9  | C8  | H8  | 2.9       |
| 413 | C4  | C9  | C10 | O11 | -45.2(4)  |
| 414 | C4  | C9  | C10 | O12 | 135.1(3)  |
| 415 | C8  | C9  | C10 | O11 | 131.8(3)  |
| 416 | C8  | C9  | C10 | O12 | -47.9(4)  |
| 417 | C5  | C6  | C7  | C8  | 0.2(4)    |
| 418 | C5  | C6  | C7  | C13 | -174.1(3) |
| 419 | H6  | C6  | C7  | C8  | -179.8    |
| 420 | H6  | C6  | C7  | C13 | 5.9       |
| 421 | C6  | C7  | C8  | C9  | 0.3(5)    |
| 422 | C6  | C7  | C8  | H8  | -179.7    |
| 423 | C13 | C7  | C8  | C9  | 174.9(3)  |
| 424 | C13 | C7  | C8  | H8  | -5.1      |
| 425 | C6  | C7  | C13 | O14 | 138.6(4)  |
| 426 | C6  | C7  | C13 | C15 | -42.1(5)  |
| 427 | C8  | C7  | C13 | O14 | -35.8(5)  |
| 428 | C8  | C7  | C13 | C15 | 143.5(3)  |
| 429 | C7  | C13 | C15 | C16 | -22.3(5)  |
| 430 | C7  | C13 | C15 | C20 | 162.6(3)  |
| 431 | O14 | C13 | C15 | C16 | 156.9(4)  |
| 432 | O14 | C13 | C15 | C20 | -18.2(5)  |
| 433 | C13 | C15 | C16 | H16 | 6.6       |
| 434 | C13 | C15 | C16 | C17 | -173.5(3) |
| 435 | C20 | C15 | C16 | H16 | -178.6    |
| 436 | C20 | C15 | C16 | C17 | 1.4(5)    |
| 437 | C13 | C15 | C20 | C19 | 174.5(3)  |
| 438 | C13 | C15 | C20 | H20 | -5.6      |
| 439 | C16 | C15 | C20 | C19 | -0.7(5)   |
| 440 | C16 | C15 | C20 | H20 | 179.3     |
| 441 | C15 | C16 | C17 | H17 | 179.0     |
| 442 | C15 | C16 | C17 | C18 | -1.0(5)   |
| 443 | H16 | C16 | C17 | H17 | -1.1      |
| 444 | H16 | C16 | C17 | C18 | 178.9     |
| 445 | C15 | C20 | C19 | C18 | -0.3(5)   |
| 446 | C15 | C20 | C19 | C24 | -179.6(3) |
| 447 | H20 | C20 | C19 | C18 | 179.7     |
| 448 | H20 | C20 | C19 | C24 | 0.4       |
| 449 | C16 | C17 | C18 | C19 | 0.0(5)    |
| 450 | C16 | C17 | C18 | C21 | 176.2(3)  |
| 451 | H17 | C17 | C18 | C19 | -180.0    |
| 452 | H17 | C17 | C18 | C21 | -3.8      |
| 453 | C17 | C18 | C19 | C20 | 0.6(5)    |
| 454 | C17 | C18 | C19 | C24 | -179.9(3) |
| 455 | C21 | C18 | C19 | C20 | -176.3(3) |
| 456 | C21 | C18 | C19 | C24 | 3.2(4)    |
| 457 | C17 | C18 | C21 | O22 | -1.4(7)   |

|     |      |     |     |      |           |
|-----|------|-----|-----|------|-----------|
| 458 | C17  | C18 | C21 | N23  | 179.4(4)  |
| 459 | C19  | C18 | C21 | O22  | 175.1(4)  |
| 460 | C19  | C18 | C21 | N23  | -4.0(4)   |
| 461 | C20  | C19 | C24 | N23  | 178.3(4)  |
| 462 | C20  | C19 | C24 | O25  | -1.4(7)   |
| 463 | C18  | C19 | C24 | N23  | -1.1(4)   |
| 464 | C18  | C19 | C24 | O25  | 179.2(4)  |
| 465 | C18  | C21 | N23 | C24  | 3.5(4)    |
| 466 | C18  | C21 | N23 | C26  | 174.7(3)  |
| 467 | O22  | C21 | N23 | C24  | -175.7(4) |
| 468 | O22  | C21 | N23 | C26  | -4.5(6)   |
| 469 | C19  | C24 | N23 | C21  | -1.6(4)   |
| 470 | C19  | C24 | N23 | C26  | -173.5(3) |
| 471 | O25  | C24 | N23 | C21  | 178.1(4)  |
| 472 | O25  | C24 | N23 | C26  | 6.3(6)    |
| 473 | C21  | N23 | C26 | H26  | 179(2)    |
| 474 | C21  | N23 | C26 | C27  | 59.8(5)   |
| 475 | C21  | N23 | C26 | C31  | -66.0(5)  |
| 476 | C24  | N23 | C26 | H26  | -10(2)    |
| 477 | C24  | N23 | C26 | C27  | -129.6(3) |
| 478 | C24  | N23 | C26 | C31  | 104.6(4)  |
| 479 | N23  | C26 | C27 | H27A | 58.1      |
| 480 | N23  | C26 | C27 | H27B | -60.9     |
| 481 | N23  | C26 | C27 | C28  | 178.6(3)  |
| 482 | H26  | C26 | C27 | H27A | -60       |
| 483 | H26  | C26 | C27 | H27B | -179      |
| 484 | H26  | C26 | C27 | C28  | 60(2)     |
| 485 | C31  | C26 | C27 | H27A | -177.0    |
| 486 | C31  | C26 | C27 | H27B | 64.1      |
| 487 | C31  | C26 | C27 | C28  | -56.4(4)  |
| 488 | N23  | C26 | C31 | C30  | -178.7(3) |
| 489 | N23  | C26 | C31 | H31A | 60.3      |
| 490 | N23  | C26 | C31 | H31B | -57.8     |
| 491 | H26  | C26 | C31 | C30  | -63(2)    |
| 492 | H26  | C26 | C31 | H31A | 176       |
| 493 | H26  | C26 | C31 | H31B | 58        |
| 494 | C27  | C26 | C31 | C30  | 55.5(4)   |
| 495 | C27  | C26 | C31 | H31A | -65.4     |
| 496 | C27  | C26 | C31 | H31B | 176.5     |
| 497 | C26  | C27 | C28 | H28A | 177.8     |
| 498 | C26  | C27 | C28 | H28B | -63.3     |
| 499 | C26  | C27 | C28 | C29  | 57.3(4)   |
| 500 | H27A | C27 | C28 | H28A | -61.7     |
| 501 | H27A | C27 | C28 | H28B | 57.3      |
| 502 | H27A | C27 | C28 | C29  | 177.8     |
| 503 | H27B | C27 | C28 | H28A | 57.2      |
| 504 | H27B | C27 | C28 | H28B | 176.2     |
| 505 | H27B | C27 | C28 | C29  | -63.3     |
| 506 | C26  | C31 | C30 | C29  | -55.1(4)  |
| 507 | C26  | C31 | C30 | H30A | 65.6      |
| 508 | C26  | C31 | C30 | H30B | -175.8    |

|     |      |     |     |      |           |
|-----|------|-----|-----|------|-----------|
| 509 | H31A | C31 | C30 | C29  | 65.8      |
| 510 | H31A | C31 | C30 | H30A | -173.5    |
| 511 | H31A | C31 | C30 | H30B | -54.9     |
| 512 | H31B | C31 | C30 | C29  | -176.0    |
| 513 | H31B | C31 | C30 | H30A | -55.3     |
| 514 | H31B | C31 | C30 | H30B | 63.3      |
| 515 | C27  | C28 | C29 | H29  | 67(3)     |
| 516 | C27  | C28 | C29 | C30  | -59.6(4)  |
| 517 | C27  | C28 | C29 | N32  | 178.3(3)  |
| 518 | H28A | C28 | C29 | H29  | -53       |
| 519 | H28A | C28 | C29 | C30  | 179.9     |
| 520 | H28A | C28 | C29 | N32  | 57.8      |
| 521 | H28B | C28 | C29 | H29  | -172      |
| 522 | H28B | C28 | C29 | C30  | 61.0      |
| 523 | H28B | C28 | C29 | N32  | -61.1     |
| 524 | C28  | C29 | C30 | C31  | 58.1(4)   |
| 525 | C28  | C29 | C30 | H30A | -62.6     |
| 526 | C28  | C29 | C30 | H30B | 178.9     |
| 527 | H29  | C29 | C30 | C31  | -65(3)    |
| 528 | H29  | C29 | C30 | H30A | 174       |
| 529 | H29  | C29 | C30 | H30B | 56        |
| 530 | N32  | C29 | C30 | C31  | -179.2(3) |
| 531 | N32  | C29 | C30 | H30A | 60.1      |
| 532 | N32  | C29 | C30 | H30B | -58.5     |
| 533 | C28  | C29 | N32 | H32A | 66.1      |
| 534 | C28  | C29 | N32 | H32B | -54.0     |
| 535 | C28  | C29 | N32 | H32C | -174.0    |
| 536 | H29  | C29 | N32 | H32A | -179      |
| 537 | H29  | C29 | N32 | H32B | 61        |
| 538 | H29  | C29 | N32 | H32C | -59       |
| 539 | C30  | C29 | N32 | H32A | -57.6     |
| 540 | C30  | C29 | N32 | H32B | -177.6    |
| 541 | C30  | C29 | N32 | H32C | 62.3      |
| 542 | O1   | C3  | C4  | C5   | -117.9(3) |
| 543 | O1   | C3  | C4  | C9   | 56.2(4)   |
| 544 | O2   | C3  | C4  | C5   | 61.2(4)   |
| 545 | O2   | C3  | C4  | C9   | -124.7(3) |
| 546 | C3   | C4  | C5  | H5   | -7.0      |
| 547 | C3   | C4  | C5  | C6   | 173.0(3)  |
| 548 | C9   | C4  | C5  | H5   | 178.9     |
| 549 | C9   | C4  | C5  | C6   | -1.1(4)   |
| 550 | C3   | C4  | C9  | C8   | -173.6(3) |
| 551 | C3   | C4  | C9  | C10  | 9.4(4)    |
| 552 | C5   | C4  | C9  | C8   | 0.5(4)    |
| 553 | C5   | C4  | C9  | C10  | -176.4(3) |
| 554 | C4   | C5  | C6  | H6   | -179.1    |
| 555 | C4   | C5  | C6  | C7   | 0.9(4)    |
| 556 | H5   | C5  | C6  | H6   | 0.9       |
| 557 | H5   | C5  | C6  | C7   | -179.0    |
| 558 | C4   | C9  | C8  | C7   | 0.1(4)    |
| 559 | C4   | C9  | C8  | H8   | -179.8    |

|     |     |     |     |     |           |
|-----|-----|-----|-----|-----|-----------|
| 560 | C10 | C9  | C8  | C7  | 177.1(3)  |
| 561 | C10 | C9  | C8  | H8  | -2.9      |
| 562 | C4  | C9  | C10 | O11 | 45.2(4)   |
| 563 | C4  | C9  | C10 | O12 | -135.1(3) |
| 564 | C8  | C9  | C10 | O11 | -131.8(3) |
| 565 | C8  | C9  | C10 | O12 | 47.9(4)   |
| 566 | C5  | C6  | C7  | C8  | -0.2(4)   |
| 567 | C5  | C6  | C7  | C13 | 174.1(3)  |
| 568 | H6  | C6  | C7  | C8  | 179.8     |
| 569 | H6  | C6  | C7  | C13 | -5.9      |
| 570 | C6  | C7  | C8  | C9  | -0.3(5)   |
| 571 | C6  | C7  | C8  | H8  | 179.7     |
| 572 | C13 | C7  | C8  | C9  | -174.9(3) |
| 573 | C13 | C7  | C8  | H8  | 5.1       |
| 574 | C6  | C7  | C13 | O14 | -138.6(4) |
| 575 | C6  | C7  | C13 | C15 | 42.1(5)   |
| 576 | C8  | C7  | C13 | O14 | 35.8(5)   |
| 577 | C8  | C7  | C13 | C15 | -143.5(3) |
| 578 | C7  | C13 | C15 | C16 | 22.3(5)   |
| 579 | C7  | C13 | C15 | C20 | -162.6(3) |
| 580 | O14 | C13 | C15 | C16 | -156.9(4) |
| 581 | O14 | C13 | C15 | C20 | 18.2(5)   |
| 582 | C9  | C10 | O11 | Co  | 179.4     |
| 583 | O12 | C10 | O11 | Co  | -0.3      |
| 584 | C9  | C10 | O12 | Co  | -179.4    |
| 585 | O11 | C10 | O12 | Co  | 0.3       |
| 586 | C10 | O11 | Co  | O12 | 0.2       |
| 587 | C10 | O12 | Co  | O11 | -0.1      |
| 588 | C13 | C15 | C16 | H16 | -6.6      |
| 589 | C13 | C15 | C16 | C17 | 173.5(3)  |
| 590 | C20 | C15 | C16 | H16 | 178.6     |
| 591 | C20 | C15 | C16 | C17 | -1.4(5)   |
| 592 | C13 | C15 | C20 | C19 | -174.5(3) |
| 593 | C13 | C15 | C20 | H20 | 5.6       |
| 594 | C16 | C15 | C20 | C19 | 0.7(5)    |
| 595 | C16 | C15 | C20 | H20 | -179.3    |
| 596 | C15 | C16 | C17 | H17 | -179.0    |
| 597 | C15 | C16 | C17 | C18 | 1.0(5)    |
| 598 | H16 | C16 | C17 | H17 | 1.1       |
| 599 | H16 | C16 | C17 | C18 | -178.9    |
| 600 | C15 | C20 | C19 | C18 | 0.3(5)    |
| 601 | C15 | C20 | C19 | C24 | 179.6(3)  |
| 602 | H20 | C20 | C19 | C18 | -179.7    |
| 603 | H20 | C20 | C19 | C24 | -0.4      |
| 604 | C16 | C17 | C18 | C19 | -0.0(5)   |
| 605 | C16 | C17 | C18 | C21 | -176.2(3) |
| 606 | H17 | C17 | C18 | C19 | 180.0     |
| 607 | H17 | C17 | C18 | C21 | 3.8       |
| 608 | C17 | C18 | C19 | C20 | -0.6(5)   |
| 609 | C17 | C18 | C19 | C24 | 179.9(3)  |
| 610 | C21 | C18 | C19 | C20 | 176.3(3)  |

|     |      |     |     |      |           |
|-----|------|-----|-----|------|-----------|
| 611 | C21  | C18 | C19 | C24  | -3.2(4)   |
| 612 | C17  | C18 | C21 | O22  | 1.4(7)    |
| 613 | C17  | C18 | C21 | N23  | -179.4(4) |
| 614 | C19  | C18 | C21 | O22  | -175.1(4) |
| 615 | C19  | C18 | C21 | N23  | 4.0(4)    |
| 616 | C20  | C19 | C24 | N23  | -178.3(4) |
| 617 | C20  | C19 | C24 | O25  | 1.4(7)    |
| 618 | C18  | C19 | C24 | N23  | 1.1(4)    |
| 619 | C18  | C19 | C24 | O25  | -179.2(4) |
| 620 | C18  | C21 | N23 | C24  | -3.5(4)   |
| 621 | C18  | C21 | N23 | C26  | -174.7(3) |
| 622 | O22  | C21 | N23 | C24  | 175.7(4)  |
| 623 | O22  | C21 | N23 | C26  | 4.5(6)    |
| 624 | C19  | C24 | N23 | C21  | 1.6(4)    |
| 625 | C19  | C24 | N23 | C26  | 173.5(3)  |
| 626 | O25  | C24 | N23 | C21  | -178.1(4) |
| 627 | O25  | C24 | N23 | C26  | -6.3(6)   |
| 628 | C21  | N23 | C26 | H26  | -179(2)   |
| 629 | C21  | N23 | C26 | C27  | -59.8(5)  |
| 630 | C21  | N23 | C26 | C31  | 66.0(5)   |
| 631 | C24  | N23 | C26 | H26  | 10(2)     |
| 632 | C24  | N23 | C26 | C27  | 129.6(3)  |
| 633 | C24  | N23 | C26 | C31  | -104.6(4) |
| 634 | N23  | C26 | C27 | H27A | -58.1     |
| 635 | N23  | C26 | C27 | H27B | 60.9      |
| 636 | N23  | C26 | C27 | C28  | -178.6(3) |
| 637 | H26  | C26 | C27 | H27A | 60        |
| 638 | H26  | C26 | C27 | H27B | 179       |
| 639 | H26  | C26 | C27 | C28  | -60(2)    |
| 640 | C31  | C26 | C27 | H27A | 177.0     |
| 641 | C31  | C26 | C27 | H27B | -64.1     |
| 642 | C31  | C26 | C27 | C28  | 56.4(4)   |
| 643 | N23  | C26 | C31 | C30  | 178.7(3)  |
| 644 | N23  | C26 | C31 | H31A | -60.3     |
| 645 | N23  | C26 | C31 | H31B | 57.8      |
| 646 | H26  | C26 | C31 | C30  | 63(2)     |
| 647 | H26  | C26 | C31 | H31A | -176      |
| 648 | H26  | C26 | C31 | H31B | -58       |
| 649 | C27  | C26 | C31 | C30  | -55.5(4)  |
| 650 | C27  | C26 | C31 | H31A | 65.4      |
| 651 | C27  | C26 | C31 | H31B | -176.5    |
| 652 | C26  | C27 | C28 | H28A | -177.8    |
| 653 | C26  | C27 | C28 | H28B | 63.3      |
| 654 | C26  | C27 | C28 | C29  | -57.3(4)  |
| 655 | H27A | C27 | C28 | H28A | 61.7      |
| 656 | H27A | C27 | C28 | H28B | -57.3     |
| 657 | H27A | C27 | C28 | C29  | -177.8    |
| 658 | H27B | C27 | C28 | H28A | -57.2     |
| 659 | H27B | C27 | C28 | H28B | -176.2    |
| 660 | H27B | C27 | C28 | C29  | 63.3      |
| 661 | C26  | C31 | C30 | C29  | 55.1(4)   |

|     |      |     |     |      |           |
|-----|------|-----|-----|------|-----------|
| 662 | C26  | C31 | C30 | H30A | -65.6     |
| 663 | C26  | C31 | C30 | H30B | 175.8     |
| 664 | H31A | C31 | C30 | C29  | -65.8     |
| 665 | H31A | C31 | C30 | H30A | 173.5     |
| 666 | H31A | C31 | C30 | H30B | 54.9      |
| 667 | H31B | C31 | C30 | C29  | 176.0     |
| 668 | H31B | C31 | C30 | H30A | 55.3      |
| 669 | H31B | C31 | C30 | H30B | -63.3     |
| 670 | C27  | C28 | C29 | H29  | -67(3)    |
| 671 | C27  | C28 | C29 | C30  | 59.6(4)   |
| 672 | C27  | C28 | C29 | N32  | -178.3(3) |
| 673 | H28A | C28 | C29 | H29  | 53        |
| 674 | H28A | C28 | C29 | C30  | -179.9    |
| 675 | H28A | C28 | C29 | N32  | -57.8     |
| 676 | H28B | C28 | C29 | H29  | 172       |
| 677 | H28B | C28 | C29 | C30  | -61.0     |
| 678 | H28B | C28 | C29 | N32  | 61.1      |
| 679 | C28  | C29 | C30 | C31  | -58.1(4)  |
| 680 | C28  | C29 | C30 | H30A | 62.6      |
| 681 | C28  | C29 | C30 | H30B | -178.9    |
| 682 | H29  | C29 | C30 | C31  | 65(3)     |
| 683 | H29  | C29 | C30 | H30A | -174      |
| 684 | H29  | C29 | C30 | H30B | -56       |
| 685 | N32  | C29 | C30 | C31  | 179.2(3)  |
| 686 | N32  | C29 | C30 | H30A | -60.1     |
| 687 | N32  | C29 | C30 | H30B | 58.5      |
| 688 | C28  | C29 | N32 | H32A | -66.1     |
| 689 | C28  | C29 | N32 | H32B | 54.0      |
| 690 | C28  | C29 | N32 | H32C | 174.0     |
| 691 | H29  | C29 | N32 | H32A | 179       |
| 692 | H29  | C29 | N32 | H32B | -61       |
| 693 | H29  | C29 | N32 | H32C | 59        |
| 694 | C30  | C29 | N32 | H32A | 57.6      |
| 695 | C30  | C29 | N32 | H32B | 177.6     |
| 696 | C30  | C29 | N32 | H32C | -62.3     |
| 697 | Co   | O1  | C3  | O2   | 44.1      |
| 698 | Co   | O1  | C3  | C4   | -134.9    |
| 699 | Co   | O1  | C3  | O2   | -44.1     |
| 700 | Co   | O1  | C3  | C4   | 134.9     |
| 701 | O1   | C3  | C4  | C5   | 117.9(3)  |
| 702 | O1   | C3  | C4  | C9   | -56.2(4)  |
| 703 | O2   | C3  | C4  | C5   | -61.2(4)  |
| 704 | O2   | C3  | C4  | C9   | 124.7(3)  |
| 705 | C3   | C4  | C5  | H5   | 7.0       |
| 706 | C3   | C4  | C5  | C6   | -173.0(3) |
| 707 | C9   | C4  | C5  | H5   | -178.9    |
| 708 | C9   | C4  | C5  | C6   | 1.1(4)    |
| 709 | C3   | C4  | C9  | C8   | 173.6(3)  |
| 710 | C3   | C4  | C9  | C10  | -9.4(4)   |
| 711 | C5   | C4  | C9  | C8   | -0.5(4)   |
| 712 | C5   | C4  | C9  | C10  | 176.4(3)  |



|     |     |     |     |     |           |
|-----|-----|-----|-----|-----|-----------|
| 713 | C4  | C5  | C6  | H6  | 179.1     |
| 714 | C4  | C5  | C6  | C7  | -0.9(4)   |
| 715 | H5  | C5  | C6  | H6  | -0.9      |
| 716 | H5  | C5  | C6  | C7  | 179.0     |
| 717 | C4  | C9  | C8  | C7  | -0.1(4)   |
| 718 | C4  | C9  | C8  | H8  | 179.8     |
| 719 | C10 | C9  | C8  | C7  | -177.1(3) |
| 720 | C10 | C9  | C8  | H8  | 2.9       |
| 721 | C4  | C9  | C10 | O11 | -45.2(4)  |
| 722 | C4  | C9  | C10 | O12 | 135.1(3)  |
| 723 | C8  | C9  | C10 | O11 | 131.8(3)  |
| 724 | C8  | C9  | C10 | O12 | -47.9(4)  |
| 725 | C5  | C6  | C7  | C8  | 0.2(4)    |
| 726 | C5  | C6  | C7  | C13 | -174.1(3) |
| 727 | H6  | C6  | C7  | C8  | -179.8    |
| 728 | H6  | C6  | C7  | C13 | 5.9       |
| 729 | C6  | C7  | C8  | C9  | 0.3(5)    |
| 730 | C6  | C7  | C8  | H8  | -179.7    |
| 731 | C13 | C7  | C8  | C9  | 174.9(3)  |
| 732 | C13 | C7  | C8  | H8  | -5.1      |
| 733 | C6  | C7  | C13 | O14 | 138.6(4)  |
| 734 | C6  | C7  | C13 | C15 | -42.1(5)  |
| 735 | C8  | C7  | C13 | O14 | -35.8(5)  |
| 736 | C8  | C7  | C13 | C15 | 143.5(3)  |
| 737 | C7  | C13 | C15 | C16 | -22.3(5)  |
| 738 | C7  | C13 | C15 | C20 | 162.6(3)  |
| 739 | O14 | C13 | C15 | C16 | 156.9(4)  |
| 740 | O14 | C13 | C15 | C20 | -18.2(5)  |
| 741 | C9  | C10 | O11 | Co  | -179.4    |
| 742 | O12 | C10 | O11 | Co  | 0.3       |
| 743 | C9  | C10 | O12 | Co  | 179.4     |
| 744 | O11 | C10 | O12 | Co  | -0.3      |
| 745 | C10 | O11 | Co  | O12 | -0.2      |
| 746 | C10 | O12 | Co  | O11 | 0.1       |
| 747 | C13 | C15 | C16 | H16 | 6.6       |
| 748 | C13 | C15 | C16 | C17 | -173.5(3) |
| 749 | C20 | C15 | C16 | H16 | -178.6    |
| 750 | C20 | C15 | C16 | C17 | 1.4(5)    |
| 751 | C13 | C15 | C20 | C19 | 174.5(3)  |
| 752 | C13 | C15 | C20 | H20 | -5.6      |
| 753 | C16 | C15 | C20 | C19 | -0.7(5)   |
| 754 | C16 | C15 | C20 | H20 | 179.3     |
| 755 | C15 | C16 | C17 | H17 | 179.0     |
| 756 | C15 | C16 | C17 | C18 | -1.0(5)   |
| 757 | H16 | C16 | C17 | H17 | -1.1      |
| 758 | H16 | C16 | C17 | C18 | 178.9     |
| 759 | C15 | C20 | C19 | C18 | -0.3(5)   |
| 760 | C15 | C20 | C19 | C24 | -179.6(3) |
| 761 | H20 | C20 | C19 | C18 | 179.7     |
| 762 | H20 | C20 | C19 | C24 | 0.4       |
| 763 | C16 | C17 | C18 | C19 | 0.0(5)    |

|     |      |     |     |      |           |
|-----|------|-----|-----|------|-----------|
| 764 | C16  | C17 | C18 | C21  | 176.2(3)  |
| 765 | H17  | C17 | C18 | C19  | -180.0    |
| 766 | H17  | C17 | C18 | C21  | -3.8      |
| 767 | C17  | C18 | C19 | C20  | 0.6(5)    |
| 768 | C17  | C18 | C19 | C24  | -179.9(3) |
| 769 | C21  | C18 | C19 | C20  | -176.3(3) |
| 770 | C21  | C18 | C19 | C24  | 3.2(4)    |
| 771 | C17  | C18 | C21 | O22  | -1.4(7)   |
| 772 | C17  | C18 | C21 | N23  | 179.4(4)  |
| 773 | C19  | C18 | C21 | O22  | 175.1(4)  |
| 774 | C19  | C18 | C21 | N23  | -4.0(4)   |
| 775 | C20  | C19 | C24 | N23  | 178.3(4)  |
| 776 | C20  | C19 | C24 | O25  | -1.4(7)   |
| 777 | C18  | C19 | C24 | N23  | -1.1(4)   |
| 778 | C18  | C19 | C24 | O25  | 179.2(4)  |
| 779 | C18  | C21 | N23 | C24  | 3.5(4)    |
| 780 | C18  | C21 | N23 | C26  | 174.7(3)  |
| 781 | O22  | C21 | N23 | C24  | -175.7(4) |
| 782 | O22  | C21 | N23 | C26  | -4.5(6)   |
| 783 | C19  | C24 | N23 | C21  | -1.6(4)   |
| 784 | C19  | C24 | N23 | C26  | -173.5(3) |
| 785 | O25  | C24 | N23 | C21  | 178.1(4)  |
| 786 | O25  | C24 | N23 | C26  | 6.3(6)    |
| 787 | C21  | N23 | C26 | H26  | 179(2)    |
| 788 | C21  | N23 | C26 | C27  | 59.8(5)   |
| 789 | C21  | N23 | C26 | C31  | -66.0(5)  |
| 790 | C24  | N23 | C26 | H26  | -10(2)    |
| 791 | C24  | N23 | C26 | C27  | -129.6(3) |
| 792 | C24  | N23 | C26 | C31  | 104.6(4)  |
| 793 | N23  | C26 | C27 | H27A | 58.1      |
| 794 | N23  | C26 | C27 | H27B | -60.9     |
| 795 | N23  | C26 | C27 | C28  | 178.6(3)  |
| 796 | H26  | C26 | C27 | H27A | -60       |
| 797 | H26  | C26 | C27 | H27B | -179      |
| 798 | H26  | C26 | C27 | C28  | 60(2)     |
| 799 | C31  | C26 | C27 | H27A | -177.0    |
| 800 | C31  | C26 | C27 | H27B | 64.1      |
| 801 | C31  | C26 | C27 | C28  | -56.4(4)  |
| 802 | N23  | C26 | C31 | C30  | -178.7(3) |
| 803 | N23  | C26 | C31 | H31A | 60.3      |
| 804 | N23  | C26 | C31 | H31B | -57.8     |
| 805 | H26  | C26 | C31 | C30  | -63(2)    |
| 806 | H26  | C26 | C31 | H31A | 176       |
| 807 | H26  | C26 | C31 | H31B | 58        |
| 808 | C27  | C26 | C31 | C30  | 55.5(4)   |
| 809 | C27  | C26 | C31 | H31A | -65.4     |
| 810 | C27  | C26 | C31 | H31B | 176.5     |
| 811 | C26  | C27 | C28 | H28A | 177.8     |
| 812 | C26  | C27 | C28 | H28B | -63.3     |
| 813 | C26  | C27 | C28 | C29  | 57.3(4)   |
| 814 | H27A | C27 | C28 | H28A | -61.7     |

|     |      |     |     |      |           |
|-----|------|-----|-----|------|-----------|
| 815 | H27A | C27 | C28 | H28B | 57.3      |
| 816 | H27A | C27 | C28 | C29  | 177.8     |
| 817 | H27B | C27 | C28 | H28A | 57.2      |
| 818 | H27B | C27 | C28 | H28B | 176.2     |
| 819 | H27B | C27 | C28 | C29  | -63.3     |
| 820 | C26  | C31 | C30 | C29  | -55.1(4)  |
| 821 | C26  | C31 | C30 | H30A | 65.6      |
| 822 | C26  | C31 | C30 | H30B | -175.8    |
| 823 | H31A | C31 | C30 | C29  | 65.8      |
| 824 | H31A | C31 | C30 | H30A | -173.5    |
| 825 | H31A | C31 | C30 | H30B | -54.9     |
| 826 | H31B | C31 | C30 | C29  | -176.0    |
| 827 | H31B | C31 | C30 | H30A | -55.3     |
| 828 | H31B | C31 | C30 | H30B | 63.3      |
| 829 | C27  | C28 | C29 | H29  | 67(3)     |
| 830 | C27  | C28 | C29 | C30  | -59.6(4)  |
| 831 | C27  | C28 | C29 | N32  | 178.3(3)  |
| 832 | H28A | C28 | C29 | H29  | -53       |
| 833 | H28A | C28 | C29 | C30  | 179.9     |
| 834 | H28A | C28 | C29 | N32  | 57.8      |
| 835 | H28B | C28 | C29 | H29  | -172      |
| 836 | H28B | C28 | C29 | C30  | 61.0      |
| 837 | H28B | C28 | C29 | N32  | -61.1     |
| 838 | C28  | C29 | C30 | C31  | 58.1(4)   |
| 839 | C28  | C29 | C30 | H30A | -62.6     |
| 840 | C28  | C29 | C30 | H30B | 178.9     |
| 841 | H29  | C29 | C30 | C31  | -65(3)    |
| 842 | H29  | C29 | C30 | H30A | 174       |
| 843 | H29  | C29 | C30 | H30B | 56        |
| 844 | N32  | C29 | C30 | C31  | -179.2(3) |
| 845 | N32  | C29 | C30 | H30A | 60.1      |
| 846 | N32  | C29 | C30 | H30B | -58.5     |
| 847 | C28  | C29 | N32 | H32A | 66.1      |
| 848 | C28  | C29 | N32 | H32B | -54.0     |
| 849 | C28  | C29 | N32 | H32C | -174.0    |
| 850 | H29  | C29 | N32 | H32A | -179      |
| 851 | H29  | C29 | N32 | H32B | 61        |
| 852 | H29  | C29 | N32 | H32C | -59       |
| 853 | C30  | C29 | N32 | H32A | -57.6     |
| 854 | C30  | C29 | N32 | H32B | -177.6    |
| 855 | C30  | C29 | N32 | H32C | 62.3      |
| 856 | O1   | C3  | C4  | C5   | -117.9(3) |
| 857 | O1   | C3  | C4  | C9   | 56.2(4)   |
| 858 | O2   | C3  | C4  | C5   | 61.2(4)   |
| 859 | O2   | C3  | C4  | C9   | -124.7(3) |
| 860 | C3   | C4  | C5  | H5   | -7.0      |
| 861 | C3   | C4  | C5  | C6   | 173.0(3)  |
| 862 | C9   | C4  | C5  | H5   | 178.9     |
| 863 | C9   | C4  | C5  | C6   | -1.1(4)   |
| 864 | C3   | C4  | C9  | C8   | -173.6(3) |
| 865 | C3   | C4  | C9  | C10  | 9.4(4)    |

|     |     |     |     |     |           |
|-----|-----|-----|-----|-----|-----------|
| 866 | C5  | C4  | C9  | C8  | 0.5(4)    |
| 867 | C5  | C4  | C9  | C10 | -176.4(3) |
| 868 | C4  | C5  | C6  | H6  | -179.1    |
| 869 | C4  | C5  | C6  | C7  | 0.9(4)    |
| 870 | H5  | C5  | C6  | H6  | 0.9       |
| 871 | H5  | C5  | C6  | C7  | -179.0    |
| 872 | C4  | C9  | C8  | C7  | 0.1(4)    |
| 873 | C4  | C9  | C8  | H8  | -179.8    |
| 874 | C10 | C9  | C8  | C7  | 177.1(3)  |
| 875 | C10 | C9  | C8  | H8  | -2.9      |
| 876 | C4  | C9  | C10 | O11 | 45.2(4)   |
| 877 | C4  | C9  | C10 | O12 | -135.1(3) |
| 878 | C8  | C9  | C10 | O11 | -131.8(3) |
| 879 | C8  | C9  | C10 | O12 | 47.9(4)   |
| 880 | C5  | C6  | C7  | C8  | -0.2(4)   |
| 881 | C5  | C6  | C7  | C13 | 174.1(3)  |
| 882 | H6  | C6  | C7  | C8  | 179.8     |
| 883 | H6  | C6  | C7  | C13 | -5.9      |
| 884 | C6  | C7  | C8  | C9  | -0.3(5)   |
| 885 | C6  | C7  | C8  | H8  | 179.7     |
| 886 | C13 | C7  | C8  | C9  | -174.9(3) |
| 887 | C13 | C7  | C8  | H8  | 5.1       |
| 888 | C6  | C7  | C13 | O14 | -138.6(4) |
| 889 | C6  | C7  | C13 | C15 | 42.1(5)   |
| 890 | C8  | C7  | C13 | O14 | 35.8(5)   |
| 891 | C8  | C7  | C13 | C15 | -143.5(3) |
| 892 | C7  | C13 | C15 | C16 | 22.3(5)   |
| 893 | C7  | C13 | C15 | C20 | -162.6(3) |
| 894 | O14 | C13 | C15 | C16 | -156.9(4) |
| 895 | O14 | C13 | C15 | C20 | 18.2(5)   |
| 896 | C13 | C15 | C16 | H16 | -6.6      |
| 897 | C13 | C15 | C16 | C17 | 173.5(3)  |
| 898 | C20 | C15 | C16 | H16 | 178.6     |
| 899 | C20 | C15 | C16 | C17 | -1.4(5)   |
| 900 | C13 | C15 | C20 | C19 | -174.5(3) |
| 901 | C13 | C15 | C20 | H20 | 5.6       |
| 902 | C16 | C15 | C20 | C19 | 0.7(5)    |
| 903 | C16 | C15 | C20 | H20 | -179.3    |
| 904 | C15 | C16 | C17 | H17 | -179.0    |
| 905 | C15 | C16 | C17 | C18 | 1.0(5)    |
| 906 | H16 | C16 | C17 | H17 | 1.1       |
| 907 | H16 | C16 | C17 | C18 | -178.9    |
| 908 | C15 | C20 | C19 | C18 | 0.3(5)    |
| 909 | C15 | C20 | C19 | C24 | 179.6(3)  |
| 910 | H20 | C20 | C19 | C18 | -179.7    |
| 911 | H20 | C20 | C19 | C24 | -0.4      |
| 912 | C16 | C17 | C18 | C19 | -0.0(5)   |
| 913 | C16 | C17 | C18 | C21 | -176.2(3) |
| 914 | H17 | C17 | C18 | C19 | 180.0     |
| 915 | H17 | C17 | C18 | C21 | 3.8       |
| 916 | C17 | C18 | C19 | C20 | -0.6(5)   |

|     |      |     |     |      |           |
|-----|------|-----|-----|------|-----------|
| 917 | C17  | C18 | C19 | C24  | 179.9(3)  |
| 918 | C21  | C18 | C19 | C20  | 176.3(3)  |
| 919 | C21  | C18 | C19 | C24  | -3.2(4)   |
| 920 | C17  | C18 | C21 | O22  | 1.4(7)    |
| 921 | C17  | C18 | C21 | N23  | -179.4(4) |
| 922 | C19  | C18 | C21 | O22  | -175.1(4) |
| 923 | C19  | C18 | C21 | N23  | 4.0(4)    |
| 924 | C20  | C19 | C24 | N23  | -178.3(4) |
| 925 | C20  | C19 | C24 | O25  | 1.4(7)    |
| 926 | C18  | C19 | C24 | N23  | 1.1(4)    |
| 927 | C18  | C19 | C24 | O25  | -179.2(4) |
| 928 | C18  | C21 | N23 | C24  | -3.5(4)   |
| 929 | C18  | C21 | N23 | C26  | -174.7(3) |
| 930 | O22  | C21 | N23 | C24  | 175.7(4)  |
| 931 | O22  | C21 | N23 | C26  | 4.5(6)    |
| 932 | C19  | C24 | N23 | C21  | 1.6(4)    |
| 933 | C19  | C24 | N23 | C26  | 173.5(3)  |
| 934 | O25  | C24 | N23 | C21  | -178.1(4) |
| 935 | O25  | C24 | N23 | C26  | -6.3(6)   |
| 936 | C21  | N23 | C26 | H26  | -179(2)   |
| 937 | C21  | N23 | C26 | C27  | -59.8(5)  |
| 938 | C21  | N23 | C26 | C31  | 66.0(5)   |
| 939 | C24  | N23 | C26 | H26  | 10(2)     |
| 940 | C24  | N23 | C26 | C27  | 129.6(3)  |
| 941 | C24  | N23 | C26 | C31  | -104.6(4) |
| 942 | N23  | C26 | C27 | H27A | -58.1     |
| 943 | N23  | C26 | C27 | H27B | 60.9      |
| 944 | N23  | C26 | C27 | C28  | -178.6(3) |
| 945 | H26  | C26 | C27 | H27A | 60        |
| 946 | H26  | C26 | C27 | H27B | 179       |
| 947 | H26  | C26 | C27 | C28  | -60(2)    |
| 948 | C31  | C26 | C27 | H27A | 177.0     |
| 949 | C31  | C26 | C27 | H27B | -64.1     |
| 950 | C31  | C26 | C27 | C28  | 56.4(4)   |
| 951 | N23  | C26 | C31 | C30  | 178.7(3)  |
| 952 | N23  | C26 | C31 | H31A | -60.3     |
| 953 | N23  | C26 | C31 | H31B | 57.8      |
| 954 | H26  | C26 | C31 | C30  | 63(2)     |
| 955 | H26  | C26 | C31 | H31A | -176      |
| 956 | H26  | C26 | C31 | H31B | -58       |
| 957 | C27  | C26 | C31 | C30  | -55.5(4)  |
| 958 | C27  | C26 | C31 | H31A | 65.4      |
| 959 | C27  | C26 | C31 | H31B | -176.5    |
| 960 | C26  | C27 | C28 | H28A | -177.8    |
| 961 | C26  | C27 | C28 | H28B | 63.3      |
| 962 | C26  | C27 | C28 | C29  | -57.3(4)  |
| 963 | H27A | C27 | C28 | H28A | 61.7      |
| 964 | H27A | C27 | C28 | H28B | -57.3     |
| 965 | H27A | C27 | C28 | C29  | -177.8    |
| 966 | H27B | C27 | C28 | H28A | -57.2     |
| 967 | H27B | C27 | C28 | H28B | -176.2    |

|      |      |     |     |      |           |
|------|------|-----|-----|------|-----------|
| 968  | H27B | C27 | C28 | C29  | 63.3      |
| 969  | C26  | C31 | C30 | C29  | 55.1(4)   |
| 970  | C26  | C31 | C30 | H30A | -65.6     |
| 971  | C26  | C31 | C30 | H30B | 175.8     |
| 972  | H31A | C31 | C30 | C29  | -65.8     |
| 973  | H31A | C31 | C30 | H30A | 173.5     |
| 974  | H31A | C31 | C30 | H30B | 54.9      |
| 975  | H31B | C31 | C30 | C29  | 176.0     |
| 976  | H31B | C31 | C30 | H30A | 55.3      |
| 977  | H31B | C31 | C30 | H30B | -63.3     |
| 978  | C27  | C28 | C29 | H29  | -67(3)    |
| 979  | C27  | C28 | C29 | C30  | 59.6(4)   |
| 980  | C27  | C28 | C29 | N32  | -178.3(3) |
| 981  | H28A | C28 | C29 | H29  | 53        |
| 982  | H28A | C28 | C29 | C30  | -179.9    |
| 983  | H28A | C28 | C29 | N32  | -57.8     |
| 984  | H28B | C28 | C29 | H29  | 172       |
| 985  | H28B | C28 | C29 | C30  | -61.0     |
| 986  | H28B | C28 | C29 | N32  | 61.1      |
| 987  | C28  | C29 | C30 | C31  | -58.1(4)  |
| 988  | C28  | C29 | C30 | H30A | 62.6      |
| 989  | C28  | C29 | C30 | H30B | -178.9    |
| 990  | H29  | C29 | C30 | C31  | 65(3)     |
| 991  | H29  | C29 | C30 | H30A | -174      |
| 992  | H29  | C29 | C30 | H30B | -56       |
| 993  | N32  | C29 | C30 | C31  | 179.2(3)  |
| 994  | N32  | C29 | C30 | H30A | -60.1     |
| 995  | N32  | C29 | C30 | H30B | 58.5      |
| 996  | C28  | C29 | N32 | H32A | -66.1     |
| 997  | C28  | C29 | N32 | H32B | 54.0      |
| 998  | C28  | C29 | N32 | H32C | 174.0     |
| 999  | H29  | C29 | N32 | H32A | 179       |
| 1000 | H29  | C29 | N32 | H32B | -61       |
| 1001 | H29  | C29 | N32 | H32C | 59        |
| 1002 | C30  | C29 | N32 | H32A | 57.6      |
| 1003 | C30  | C29 | N32 | H32B | 177.6     |
| 1004 | C30  | C29 | N32 | H32C | -62.3     |

---
